1 **Identification of proximal SUMO-dependent interactors using SUMO-ID**

2

3 Orhi Barroso-Gomila<sup>1</sup>, Fredrik Trulsson<sup>2</sup>, Veronica Muratore<sup>1</sup>, Iñigo Canosa<sup>1</sup>, Ana

4 Rosa Cortazar<sup>1,5</sup>, Coralia Perez<sup>1</sup>, Mikel Azkargorta<sup>1,3,4</sup>, Ibon Iloro<sup>1,3,4</sup>, Arkaitz

5 Carracedo<sup>1,5,6,7</sup>, Ana M Aransay<sup>1,3</sup>, Felix Elortza<sup>1,3,4</sup>, Ugo Mayor<sup>6,7</sup>, Alfred C. O.

6 Vertegaal<sup>2</sup>, Rosa Barrio<sup>1\*</sup>, James D. Sutherland<sup>1\*</sup>.

7

8 1. Center for Cooperative Research in Biosciences (CIC bioGUNE), Basque Research  
9 and Technology Alliance (BRTA), Bizkaia Technology Park, Building 801A, 48160  
10 Derio, Spain.

11 2. Cell and Chemical Biology, Leiden University Medical Center (LUMC), 2333 ZA  
12 Leiden, The Netherlands

13 3. CIBERehd, Instituto de Salud Carlos III, C/ Monforte de Lemos 3-5, Pabellón 11,  
14 Planta 0, 28029 Madrid, Spain.

15 4. ProteoRed-ISCI, Instituto de Salud Carlos III, C/ Monforte de Lemos 3-5, Pabellón  
16 11, Planta 0, 28029 Madrid, Spain.

17 5. CIBERONC, Instituto de Salud Carlos III, C/ Monforte de Lemos 3-5, Pabellón 11,  
18 Planta 0, 28029 Madrid, Spain.

19 6. Ikerbasque, Basque Foundation for Science, 48011 Bilbao, Spain

20 7. Biochemistry and Molecular Biology Department, University of the Basque Country  
21 (UPV/EHU), E-48940, Leioa, Spain.

22

23 (\*) Corresponding authors: [jsutherland@cicbiogune.es](mailto:jsutherland@cicbiogune.es), [rbarrio@cicbiogune.es](mailto:rbarrio@cicbiogune.es)

24 R Barrio ORCID: 0000-0002-9663-0669

25 J D Sutherland ORCID: 0000-0003-3229-793X

26

27 Lead Contact: Rosa Barrio [rbarrio@cicbiogune.es](mailto:rbarrio@cicbiogune.es)

28

29 **ABSTRACT**

30 The fast dynamics and reversibility of posttranslational modifications by the ubiquitin  
31 family pose significant challenges for research. Here we present SUMO-ID, a technology  
32 that merges proximity biotinylation by TurboID and protein-fragment complementation  
33 to find SUMO-dependent interactors of proteins of interest. We developed an optimized  
34 split-TurboID version and show SUMO interaction-dependent labelling of proteins  
35 proximal to PML and RANGAP1. SUMO-dependent interactors of PML are involved in  
36 transcription, DNA damage, stress response and SUMO modification and are highly  
37 enriched in SUMO Interacting Motifs, but may only represent a subset of the total PML  
38 proximal proteome. Likewise, SUMO-ID also allowed us to identify novel interactors of  
39 SUMOylated SALL1, a less characterized SUMO substrate. Thus, SUMO-ID is a  
40 powerful tool that allows to study the consequences of SUMO-dependent interactions,  
41 and may further unravel the complexity of the ubiquitin code.

42

## 43 INTRODUCTION

44 Ubiquitin-like (UbL) proteins belong to a superfamily of small proteins that attach  
45 covalently to target substrates in a transient and reversible manner. The UbL family  
46 includes Small Ubiquitin-like Modifiers (SUMOs). The mammalian SUMO family  
47 consists of at least three major *SUMO* paralogues (*SUMO1,-2,-3*). Human SUMO2 and  
48 SUMO3 share 97% sequence identity, whereas they share 47% of sequence identity with  
49 SUMO1<sup>1</sup>. Protein SUMOylation is a rigorously regulated cycle involving an enzymatic  
50 machinery that acts in a stepwise manner. Briefly, the C-terminal di-glycine motif of  
51 mature SUMOs binds lysines in substrates through the sequential action of E1 SUMO-  
52 activating enzyme SAE1/SAE2, E2 conjugating enzyme UBC9 and SUMO E3 ligases<sup>2</sup>.  
53 If required, SUMO as well as the substrate can be recycled by the action of SENPs that  
54 cleave the isopeptide bond. Like Ub, SUMO has internal lysines that can be further  
55 modified, extended as SUMO chains, modified by Ub chains to target degradation, or  
56 even modified by smaller moieties, like acetyl groups<sup>3-5</sup>. Together, these constitute the  
57 concept of the “SUMO code” and the ongoing challenge is to understand how these  
58 modifications drive distinct substrate outcomes and cellular fates.

59 SUMO plays crucial roles in nuclear processes underlying health and disease such  
60 as the DNA damage response, cell cycle regulation, transcription and proteostasis<sup>6</sup>.  
61 SUMO is known to control vital biological processes including development<sup>7</sup> and  
62 cholesterol homeostasis<sup>8</sup>. Improvements in mass spectrometry technology have led to the  
63 identification to date of more than 40,700 SUMO sites within 6,700 SUMO substrates<sup>9</sup>.  
64 While cell-wide proteomics approaches can help to understand global SUMO signaling<sup>10</sup>,  
65 better tools are needed that allow the study of the cause and consequences of particular  
66 SUMOylation events for individual substrates.

67 SUMO can also interact non-covalently with SUMO interacting motifs (SIMs)  
68 found in some proteins. SIMs are  $\beta$  strands composed of an hydrophobic core motif that

69 interacts with the hydrophobic residues of the SIM-binding groove of SUMOs to form an  
70 intramolecular  $\beta$ -sheet<sup>11</sup>. A well characterized role of the SUMO-SIM interaction  
71 concerns the SUMO-targeted Ub ligases (STUbL). The two described human STUbLs,  
72 RNF4 and Arkadia/RNF111, recognize poly-SUMOylated substrates through their SIMs  
73 and ubiquitylate them, leading to their proteasomal degradation<sup>12,13</sup>. The SUMO-SIM  
74 interaction also plays critical roles in assembling protein complexes: interaction of the  
75 SIM1 of Ran Binding Protein 2 (RanBP2) with the SUMOylated version of Ran GTPase-  
76 activating protein 1 (RanGAP1) is crucial for the RanBP2/RanGAP1\*SUMO1/UBC9 E3  
77 ligase complex formation<sup>14</sup>.

78 Another intriguing function of SUMO-SIM interaction is the targeting of proteins  
79 to Promyelocytic Leukemia Nuclear Bodies (PML NBs). PML NBs are membrane-less  
80 ring-like protein structures found in the nucleus. They are bound to the nuclear matrix,  
81 make contacts with chromatin fibers<sup>15</sup> and associate with transcriptionally active genomic  
82 regions<sup>16</sup>. They consist of a shell composed of PML proteins that surround an inner core  
83 in which client proteins localize. Due to the heterogeneity of client proteins, PML NBs  
84 have diverse nuclear functions (reviewed in<sup>17,18</sup>). The *PML* gene contains 9 exons and  
85 numerous splicing variants. All PML isoforms contain the N terminal TRiPartite Motif  
86 (TRIM) that is responsible for PML polymerization and NB formation<sup>19</sup>, binding to  
87 Arsenic Trioxide (ATO)<sup>20</sup> and may act as an oxidative stress sensor<sup>18</sup>. PML also contains  
88 a phospho-SIM located at its exon 7 and shared by most PML isoforms<sup>21</sup>. Almost all PML  
89 isoforms contain three putative SUMO sites: K65, K160 and K490. PML SUMOylation  
90 is a well characterized signal for RNF4-mediated ubiquitylation and degradation<sup>22</sup>.

91 Proximity-dependent labelling methods are based on promiscuous labeling  
92 enzymes that produce reactive molecules that covalently bind neighbor proteins. Labeled  
93 proteins can be then purified and identified using affinity-purification coupled to mass

94 spectrometry methods<sup>23</sup>. Proximity-dependent biotin identification (BioID)<sup>24</sup> uses a  
95 promiscuously active *Escherichia coli* biotin ligase (BirA\*) generated by a point mutation  
96 (R118G) to biotinylate lysines in nearby proteins within an estimated range of 10 nm<sup>25</sup>.  
97 By fusing BirA\* to specific proteins, BioID efficiently identifies interactors at  
98 physiological levels in living cells<sup>26</sup>. It has been extensively used in the Ub field, for  
99 instance, to identify substrates of E3 ligases<sup>27,28</sup>. Recently, a more efficient version of  
100 BioID, termed TurboID, has been developed<sup>29</sup>, being this more suitable for transient  
101 protein-protein interaction (PPI) detection. Several studies have developed split-versions  
102 and applied “protein fragment complementation” to BioID and TurboID, where proximal  
103 biotinylation is dependent on the proximity of the fusion partners, opening new  
104 opportunities for spatial and temporal identification of complex-dependent  
105 interactomes<sup>30,31</sup>.

106 To study how SUMOylation and SUMO-SIM interactions can lead to other roles  
107 and fates for particular substrates poses particular challenges. SUMOylation occurs  
108 transiently and often in a small percentage of a given substrate. Modified proteins can be  
109 readily deSUMOylated and SUMO can be recycled and passed to other substrates.  
110 SUMO-SIM interactions are also difficult to analyze due to their weak affinity (Kd 1-100  
111  $\mu$ M). To overcome those technical issues, we developed SUMO-ID, a new strategy based  
112 on Split-TurboID to identify interactors of specific substrates dependent on SUMO  
113 conjugation or interaction. Using PML as a model, we demonstrate that SUMO-ID can  
114 enrich for factors that depend on PML-SUMO interaction. Importantly, the identified  
115 proteins are represented among proximal interactors of PML identified using full-length  
116 TurboID. We also applied SUMO-ID to a less-characterized SUMO substrate, Spalt Like  
117 Transcription Factor 1 (SALL1), and identified both known and novel interactors that  
118 depend on intact SUMOylation sites in SALL1. SUMO-ID is thus a powerful tool to study

119 transient and dynamic SUMO-dependent interaction events. The developed methodology  
120 is generic and therefore widely applicable in the Ub and UbL field to identify readers of  
121 these modifications for individual target proteins to improve our insight in non-covalent  
122 signal transduction by Ub and UbL.

## 123 **RESULTS**

### 124 **Identification of SUMO-dependent interactions: the SUMO-ID strategy**

125 We posited that Split-TurboID, in which one fragment is fused to SUMO and the  
126 complementary fragment to a protein of interest, could identify transient SUMO-  
127 dependent interactors (Fig. 1). Upon covalent SUMOylation or non-covalent SUMO-SIM  
128 interaction, both fragments are brought together, presumably close enough to allow  
129 refolding of the TurboID enzyme. In the presence of biotin, the reconstituted TurboID  
130 can then label proximal complexes, which can be purified by streptavidin pull-down and  
131 identified by liquid chromatography-mass spectrometry (LC-MS). Due to the high  
132 affinity of streptavidin-biotin interaction, harsh cell lysis and stringent washes that  
133 significantly reduce unspecific protein binding can be applied. We named this approach  
134 “SUMO-ID”.

### 135 **T194/G195 Split-TurboID enables SUMO-ID studies**

136 We applied the previously described E256/G257 BioID split-point<sup>30</sup> to TurboID,  
137 but found it unsuitable for SUMO-ID. While SUMO-dependent reconstitution of the  
138 E256/G257 was observed in our pilot experiments, the NTurboID<sup>256</sup>-fusions had a  
139 significant background biotinylating activity (Figure S1). This is likely due to residual  
140 biotin binding and activation by the intact NTurboID<sup>256</sup> biotin-binding pocket. We  
141 examined the BirA structure to identify a new TurboID split-point that would yield two  
142 completely inactive fragments (see File S1). The biotin binding pocket of BirA is  
143 composed of three  $\beta$ -strands (strands 5, 8 and 9), the N-terminus of helix E and the 110-

144 128 loop (Fig. 2A). We split TurboID at T194/G195, so that the resulting NTurboID<sup>194</sup>  
145 fragment (NTbID) carries the principal 110-128 biotin binding loop and the  $\beta$ -strands 5  
146 and 8, while the CTurboID<sup>195</sup> fragment (CTbID) carries the  $\beta$ -strand 9 necessary to the  
147 formation of the biotin binding  $\beta$ -sheet.

148 We tested T194/G195 Split-TurboID for SUMO-ID. CTbID-SUMOs were  
149 incorporated into substrates in a very efficient manner (Fig. 2B). NTbID and CTbID alone  
150 were catalytically inactive and yielded no biotinylation. Combining NTbID-substrate and  
151 CTbID-SUMOs resulted in a high-yield biotinylation activity of TurboID after 16 hours  
152 of biotin exposure. Modification of NTbID-substrates by CTbID-SUMOs (Fig. 2B,  
153 FLAG blot, black arrowheads) and its corresponding biotinylation activity (Fig. 2B,  
154 biotin blot, black arrowheads) were efficiently detected, notably in the case of PML  
155 protein. Free biotinylated CTbID-SUMOs, that might come from recycling of previously  
156 labeled moieties, were observed (Fig. 2B, biotin blot, white squares). We also examined  
157 by immunofluorescence, and confirmed that the streptavidin signal recognizing the  
158 biotinylated substrates is dependent on fragment-complementation (Fig. 2C). Thus,  
159 T194/G195 Split-TurboID biotinylation activity is dependent on fragment  
160 complementation, with reduced or no leaky biotinylation of the two fragments, so it could  
161 be useful for SUMO-ID and for studying other protein-protein interactions.

162 We applied the rapamycin-inducible dimerization system, based on FKBP (12-  
163 kDa FK506-binding protein) and FRB (FKBP-rapamycin-binding domain)<sup>32</sup>, which has  
164 been used previously to evaluate the PPI dependency of Split-BioID reconstitution<sup>30</sup>. We  
165 fused NTbID and CTbID to FRB and FKBP, respectively, and stably expressed the  
166 constructs in HEK293FT cells. We tested short and long rapamycin treatments, together  
167 with short biotin labeling times, to evaluate self-biotinylation activity of the reconstituted  
168 TurboID. As previously shown, the NTbID, even though it contains the principal biotin



169 binding 110-128 loop, was catalytically inactive after 24 hours of biotin treatment (Fig.  
170 2D). We observed that biotinylation activity of the reconstituted TurboID correlated well  
171 with rapamycin and biotin treatments, showing its dependency on PPI and biotin labeling  
172 times. 24 hours of rapamycin treatment led to a 16-fold higher FKBP/FRB PPI dependent  
173 biotinylation activity at 2 hours of labeling time. Altogether, these data demonstrate that  
174 T194/G195 Split-TurboID fragments have low intrinsic affinity and high biotinylation  
175 activity at short biotin labeling times, making them suitable for SUMO-ID.

176 **SUMO-ID detects both covalent and non-covalent SUMO-dependent interactions**  
177 **using short biotin-labeling times**

178 Interaction of a protein with SUMO can be via covalent SUMOylation or non-  
179 covalent SUMO-SIM interaction. We used PML, which can both be SUMOylated and  
180 has a well-characterized SIM domain, in conjunction with SUMO wild type (WT) or  
181 mutants that lack the C-terminal di-glycine ( $\Delta$ GG) necessary for covalent conjugation.  
182 We used a stable HEK293FT cell line expressing NTbID-PML, into which CTbID-  
183 SUMOs were transfected, using short biotin-labeling times (0.5-2 hours). We observed  
184 that CTbID-SUMO1/2 transfections led to high SUMO-dependent biotinylation activity  
185 after only 2 hours of biotin treatment (Fig. 3A, biotin blot, black arrowhead).  
186 Additionally, ATO treatment, which induces PML SUMOylation, further enhanced the  
187 SUMO-dependent biotinylation. With 30 minutes of biotin treatment, CTbID-  
188 SUMO1/2 <sup>$\Delta$ GG</sup> induced biotinylation of unmodified NTbID-PML, likely through SUMO-  
189 SIM interactions (Fig. 3A, biotin blot, white arrowhead). With longer biotin labeling (2  
190 hours), biotinylation of endogenous SUMO modified NTbID-PML was also detected,  
191 more strongly in the case of ATO treatment (Fig. 3A, biotin blot, black arrowhead).  
192 Biotinylated free CTbID-SUMO1/2 <sup>$\Delta$ GG</sup> were detected, while the WT counterparts were  
193 not biotinylated at 2 hours (Fig. 3A, biotin blot, white squares), supporting that recycling

194 of biotinylated SUMOs may be linked to longer labeling times. Indeed, additional  
195 experiments showed that appearance of free biotinylated CTbID-SUMOs increased with  
196 longer labelling times (Figure S2). Altogether, these results demonstrate that SUMO-  
197 dependent biotinylation activity for specific targets, especially at short biotin labeling  
198 times, may be a useful strategy for identifying specific SUMO-dependent interactors of  
199 those proteins.

200         Reduced labeling times and lower expression levels reduced SUMO recycling,  
201 but still allowed some degree of recycling (and therefore loss-of-specificity) to occur, so  
202 we incorporated two further modifications. First, we designed SUMO isopeptidase-  
203 resistant versions of CTbID-SUMOs (SUMO non-cleavable, or SUMOnc, Fig. 1B)<sup>33</sup>.  
204 This could also reduce the target identification derived from SUMO-SIM interactions  
205 involving free unincorporated CTbID-SUMOs, since most CTbID-SUMOncs would be  
206 incorporated into substrates. The same strategy was applied to Ub (CTbID-Ubnc).  
207 Secondly, we transferred non-cleavable CTbID-SUMOs into pTRIPZ, an all-in-one  
208 doxycycline-inducible (Dox) lentiviral vector (Fig. 1B). Regulated expression would  
209 offset any deleterious effects stemming from non-cleavable SUMO isoforms, and provide  
210 useful experimental control (i.e. non-induced *versus* induced). Inducible TRIPZ-CTbID-  
211 SUMOnc showed enhanced SUMOylation compared to the constitutive WT SUMO  
212 versions (Fig. 3B). Free non-incorporated versions of SUMO1/2nc and Ubnc were not  
213 detectable (Fig. 3B, MYC blot, white squares). Stable cell populations were established  
214 (HEK293FT, U2OS and RPE-1 cells) for each (SUMO1nc, SUMO2nc, Ubnc). Validation  
215 of TRIPZ-CTbID-SUMO2nc by WB and immunofluorescence is shown (Figure S3). We  
216 then introduced constitutively-expressed NTbID-PML into TRIPZ-CTbID-SUMO1nc or  
217 -SUMO2nc cells and proved that biotinylation occurs in PML NBs as expected, in a  
218 doxycycline dependent manner (Figure S4). These data show that the use of regulated

219 SUMOnc versions leads to both high activity and specificity needed for the SUMO-ID  
220 approach.

221 To further validate the specificity of SUMO-dependent biotinylation activity with  
222 PML, we generated control cells carrying NTbID-PML<sup>3MAS</sup>, a mutated version of PML  
223 lacking the three principal SUMOylation sites (K65, K160 and K490) and the best-  
224 characterized SIM domain. While strong SUMO-ID biotinylation activity was observed  
225 with the WT version of PML, this biotinylation activity was completely abrogated in the  
226 case of PML<sup>3MAS</sup> (Fig. 3C). This lack of biotinylation activity was specific to SUMO, as  
227 ubiquitylation-dependent biotinylation activity was observed in TRIPZ-CTbID-Ubnc /  
228 NTbID-PML<sup>3MAS</sup> double stable cell line (Figure S5). NTbID-PML<sup>WT</sup> forms true NBs,  
229 while NTbID-PML<sup>3MAS</sup> forms NB-like bodies, as reported previously<sup>34</sup> (Fig. 3D).  
230 Biotinylation driven by SUMO-ID was observed in NBs containing NTbID-PML<sup>WT</sup>, and  
231 it was enhanced after 2 hours of ATO treatment, but not in the NB-like structures  
232 containing NTbID-PML<sup>3MAS</sup>. Thus, these results show that SUMO-ID biotinylation  
233 activity is dependent on substrate-SUMO interaction.

#### 234 **SUMO-ID identifies SUMO-dependent interactors of PML**

235 Since PML NBs are known hubs of SUMO-dependent signaling<sup>17,18</sup>, we  
236 wondered which interactions in NBs via PML are SUMO-dependent, so we performed  
237 SUMO-ID using NTbID-PML<sup>WT</sup> compared to NTbID-PML<sup>3MAS</sup>, each combined with  
238 TRIPZ-CTbID-SUMO2nc. Biotinylated proteins were purified by streptavidin pull-down  
239 and sequenced by LC-MS (Table S1). 59 high-confidence SUMO-dependent interactors  
240 of PML were enriched in PML<sup>WT</sup> SUMO-ID compared to PML<sup>3MAS</sup> SUMO-ID (Fig. 4A).  
241 Among those, SUMO E3 ligases (PIAS1, PIAS2, PIAS4, TRIM28), transcriptional  
242 regulators (TRIM22, TRIM24, TRIM33, GTF2I, IRF2BP2, IFI16, ZNF280B, MED23,  
243 MEF2D, SNW1, RPAP3), and DNA repair proteins (RMI1, BLM, SLX4, XAB2) were

244 identified. Of note, PIAS1 is known to induce PML SUMOylation<sup>35</sup> and SUMO-SIM  
245 interaction of BLM is necessary for its targeting to PML bodies<sup>36</sup>, which highlights the  
246 specificity of the SUMO-ID strategy. Of particular interest, GTF2I and IRF2BP2,  
247 identified here by SUMO-ID, form fusion proteins with RARA and cause Acute  
248 Promyelocytic Leukaemia (APL, see Discussion)<sup>37,38</sup>. We validated these two proteins,  
249 as well as TRIM33 and UBC9, as SUMO-dependent interactors of PML by WB (Fig.  
250 4B).

251 STRING networking of SUMO-dependent interactors of PML shows a highly  
252 interconnected cluster related to protein SUMOylation, DNA damage response and  
253 transcriptional regulation (Fig. 4C), while GO enrichment also highlighted protein  
254 SUMOylation and transcriptional regulation, as well as DNA repair and stress response  
255 pathways (Fig. 4D; Table S2). Collectively, this data show that the SUMO-ID strategy  
256 can efficiently identify SUMO-dependent interactors of PML, and that SUMO interaction  
257 with PML reinforces essential processes.

#### 258 **PML SUMO-ID hits localize to PML NBs**

259 We checked whether some of the SUMO-dependent interactors of PML localize  
260 to NBs. We generated a YFP-PML cell line by inserting YFP into the endogenous PML  
261 locus in U2OS cells (Figure S6), and looked for co-localization of selected SUMO-  
262 dependent PML interactors by confocal microscopy. Within individual cells, we observed  
263 frequent and multiple co-localization events for PIAS4, TRIM24, TRIM33 and UBC9 in  
264 PML NBs (Fig. 5), whereas PIAS2, GTF2I and IRF2BP2 colocalizations were less  
265 frequent, suggesting heterogeneity in PML NB composition that may depend on different  
266 factors (including, but not limited to SUMOylation density, subnuclear localization, cell  
267 cycle stage, other PTMs, or contrastingly, technical limitations with antibodies or  
268 fixations).

## 269 **SUMO-dependent interactions are a subset of PML proximal proteome**

270 PML NBs are membraneless structures thought to behave as phase-separated  
271 liquids and with high heterogeneity in composition<sup>39</sup>. These characteristics make their  
272 purification very challenging, and no proteomic data are nowadays available. Therefore,  
273 to compare the obtained PML SUMO-ID specific sub-proteome with the regular PML  
274 interactome, we decided to characterize a comprehensive PML and PML<sup>3MAS</sup> proximity  
275 interactome using standard full-length TurboID (FLTbID). We generated stable U2OS  
276 cell lines for FLTbID-PML<sup>WT</sup>, FLTbID-PML<sup>3MAS</sup> and FLTbID alone, and treated them  
277 or not with ATO to induce PML SUMOylation. High confidence PML proximal  
278 proteome was composed of 271 proteins that were enriched in FLTbID-PML<sup>WT</sup> samples  
279 compared to FLTbID alone (Fig. 6A, Table S3). STRING networking showed a main  
280 core cluster composed of 73.6% of the identified proteins (Fig. 6B). The most  
281 representative subclusters were composed of 1) RNA splicing and mRNA processing  
282 proteins, 2) transcription, RNA biosynthesis and DNA damage response proteins and 3)  
283 replication and SUMOylation related proteins. This largely aligned with Gene Ontology  
284 (GO) enrichment analysis, which revealed that PML proximal interactors participate in  
285 replication, transcription, RNA splicing, DNA damage response, cell cycle regulation,  
286 SUMOylation and ubiquitylation, and telomere maintenance, consistent with fact that  
287 PML in U2OS regulates the ALT mechanism<sup>40</sup> (alternative lengthening of telomeres; Fig.  
288 6C, Table S4).

289 SUMOylation of PML is thought to be a controlling factor for composition and  
290 dynamics of NBs. Are all NB interactions linked to PML dependent on SUMO? To  
291 answer this question, we subdivided the PML interactome into SUMO-dependent or -  
292 independent interactors, by comparing FLTbID-PML<sup>WT</sup> and FLTbID-PML<sup>3MAS</sup> samples.  
293 We observed some proteins that likely localize to PML NBs<sup>41</sup>, such as NCOR-1, STAT3,

294 JUN, BRCA2 and HDAC9, were also enriched in TurboID-PML<sup>3MAS</sup>, suggesting SUMO-  
295 independent targeting to PML NBs (Table S3). Importantly, many of SUMO-dependent  
296 interactors identified by SUMO-ID are part of SUMO-dependent PML NBs proteome  
297 using standard TurboID, including PIAS2, PIAS4, TRIM24, TRIM33 and IRF2BP2 (Fig.  
298 7A; Table S3), supporting the validity of SUMO-ID to identify SUMO-dependent  
299 interactors. Interestingly, scores of some PML interactors decreased after ATO treatment  
300 (TRIM24, TRIM33, SENP5), suggesting that those proteins may rapidly undergo  
301 dissociation or degradation in response to PML SUMOylation. We confirmed such effect  
302 for TRIM24 by WB (Fig. 7B). Altogether, these data confirm that SUMO-ID identified  
303 hits are a subset of the SUMO-dependent PML proximal proteome.

#### 304 **SUMO-dependent interactors of PML are enriched in SIMs**

305 We expected that many of the SUMO-dependent PML interactors might do so via  
306 SUMO-SIM interactions and, therefore, should contain or be enriched in SIMs. To test  
307 this, we designed and executed an *in-silico* SIM enrichment analysis. We generated 1000  
308 random lists of 59 proteins (the size of the SUMO-ID identified protein list) and evaluated  
309 the presence of SIMs (Table S5). The median of single SIM and multiple SIM presence  
310 in the random lists were 45.76% and 23.73% respectively (Fig. 7C). SUMO-ID identified  
311 proteins showed a much higher content of SIMs, with single SIM and multiple SIM  
312 presence values of 96.61% and 89.83% respectively. It is noteworthy that around 83% of  
313 the identified SIMs in PML SUMO-ID list were preceded or followed within the first 4  
314 amino-acids by acidic residues (D, E) or a Serine. Since longer proteins are expected to  
315 have more SIMs, we then normalized the SIM content with the size of proteins on the  
316 lists to obtain the value of “SIMs per thousand of amino acids” (STAA) (Table S5). The  
317 values obtained with the random lists showed a Gaussian distribution (d’Agostino and  
318 Pearson normality test, K2 value 3.836, *p*-value 0.15) (Fig. 7D). The median of the values

319 obtained with the random lists was 4.85 (Log<sub>2</sub> = 2.28) STAA, while for PML SUMO-ID  
320 list was 18.42 (Log<sub>2</sub> = 4.20) STAA, which translates to a SIM enrichment value of 3.8  
321 times higher than the random lists (empirical *p*-value < 0.001). These results show that  
322 SUMO-dependent interactors of PML are highly enriched in SIMs.

### 323 **SUMO-ID identifies interactors of SUMOylated SALL1**

324 To test the sensitivity and discovery potential of the SUMO-ID, we applied this  
325 technique to SALL1, a transcriptional repressor that is SUMOylated<sup>42,43</sup>, but of which  
326 nothing is known about the causes or consequences of this modification. Using TRIPZ-  
327 CTbID-SUMO1nc or SUMO2nc HEK293FT stable cell lines, we introduced NTbID-  
328 SALL1<sup>WT</sup> or SALL1<sup>ΔSUMO</sup> (with mutations in 4 major SUMOylation consensus sites) and  
329 evaluated SUMO-ID by WB. Efficient SUMO-ID biotinylation activity was observed  
330 when using SUMO2nc (Fig. 8A, black arrowhead). NTbID-SALL1<sup>WT</sup> localizes to the  
331 nucleus, forming nuclear bodies with high SUMO-ID activity, and NTbID-SALL1<sup>ΔSUMO</sup>  
332 also forms aggregates in the cytoplasm (Fig. 8B). Specificity of SALL1 SUMO-ID was  
333 confirmed in cells, as biotinylation occurs only in SALL1<sup>WT</sup> upon doxycycline induction  
334 and biotin supplementation. SALL1 SUMO-ID identified potential SUMO-dependent  
335 interactors of SALL1 such as the transcription factors TLE3, DACH1/2 and ARID3B, as  
336 well as NuRD complex proteins GATAD2A/B, MTA1/2 and RBBP4/7 (Fig. 8C; Table  
337 S6), already known as SALL1 interactors<sup>44</sup>. We also identified components of the  
338 SUMOylation machinery, such as PIAS1. We confirmed that SUMOylated SALL1 was  
339 biotinylated and purified via SUMO-ID (Fig. 8D, black arrowheads) as well as NuRD  
340 complex proteins GATAD2B, MTA2 and RBBP4 (Fig. 8D). MCODE subclustering of  
341 the STRING interaction network showed a highly interconnected cluster composed of  
342 NuRD complex proteins (Fig. 8E) that was also enriched as GO term (*p*-value  $2.40 \cdot 10^{-4}$ ).  
343 Thus, SUMO-ID is sensitive and specific, allowing the study of SUMO-dependent

344 interactors for proteins of interest, opening new avenues of understanding how SUMO  
345 can affect their function.

## 346 **DISCUSSION**

347         The fast dynamics and reversibility of SUMOylation, and the low affinity of  
348 SUMO-SIM interactions pose significant challenges not only for SUMO research, but for  
349 respective studies of Ub and other UbLs. The use of His-tagged K0-SUMO to isolate  
350 substrates and map SUMOylation sites has been instrumental to show the widespread  
351 presence of this modification in the human proteome<sup>9,45</sup>. Direct purification of  
352 SUMOylated proteins using immunoprecipitation is a gold standard and can be applied  
353 to cells and tissues<sup>46</sup>, but is also challenging because SUMOylation might affect a small  
354 proportion of low abundance proteins, and perhaps only under certain conditions (e.g a  
355 discrete cell cycle phase or upon DNA damage). Recently, the NanoBiT-based ubiquitin  
356 conjugation assay (NUbiCA) was described that uses a split-luciferase approach to allow  
357 a quantitative assessment of Ub-modified proteins<sup>47</sup>. Bimolecular fluorescence  
358 complementation (BiFC) approaches employ a split fluorescent protein that enables the  
359 localization of UbL-modified proteins in yeast or human cells to be monitored<sup>48-50</sup>. If  
360 applied to UbLs and substrates, the BiCAP method<sup>51</sup>, which allows purification of  
361 reconstituted GFP using GFP nanobodies, could likely enrich modified substrates and  
362 perhaps interactors. However, none of these approaches captures the dynamic  
363 environment of specific UbL-modified proteins, often characterized by weak and  
364 transient interactions.

365         Here we describe SUMO-ID, a powerful technique that allows the study of the  
366 causes and consequences of SUMO-dependent interactions for specific proteins of  
367 interest. The fast biotinylation activity of TurboID and the specificity obtained with  
368 “protein fragment complementation” permit SUMO-ID to specifically biotinylate



369 interactors of substrates in a SUMO-dependent manner. Combined with sensitive  
370 proteomic methods, SUMO-ID allows the identification of specific interactors,  
371 potentially revealing enzymatic machinery responsible for the SUMOylation as well as  
372 interactors that may be stabilized or recruited as a consequence of the modification. Like  
373 approaches using BiFC, the subcellular localization of SUMO-modified substrates using  
374 SUMO-ID can also be inferred, through the use of fluorescent streptavidin. However,  
375 caution should be taken with the mentioned factors in order to maintain specificity, such  
376 is the use of non-cleavable forms of UbLs or the application of short biotin labelling  
377 times. This strategy might compromise the identification of SUMO isopeptidases since  
378 their binding to SUMOylated substrate is likely affected.

379         At the core of SUMO-ID is Split-TurboID, which individual halves should ideally  
380 have no activity, as with all split-protein approaches. For SUMO-ID, we initially applied  
381 the E256/G257 split point described for Split-BioID<sup>30</sup> to the fast-labelling TurboID  
382 derivative, but found that the N-terminal half (1-256) retained substantial biotinylation  
383 capacity. We speculate that this is because the “biotin pocket” is still intact and might  
384 allow leaky release of biotinoyl-AMP. Leaky biotinylation of TurboID 1-256 was also  
385 observed by Cho and colleagues in their recently published report on Split-TurboID<sup>31</sup>.  
386 Their final design was based on a L73/G74 split point which showed efficient proximity-  
387 dependent reconstitution and biotinylation, but still leaves the biotin pocket intact in C-  
388 terminal 74-321 half, opening the possibility of leaky biotinylation during longer labelling  
389 times or in stable cell lines. To avoid this, we developed and validated T194/G195 Split-  
390 TurboID that separates the  $\beta$ -strands 5 and 8 from the  $\beta$ -strand 9, completely abrogating  
391 any residual biotinylation activity of the fragments.

392         Here we used SUMO-ID to unravel the role of PML SUMOylation in PML NBs  
393 function. We identified 59 proteins as SUMO-dependent PML interactors that participate

394 in essential nuclear processes such as protein SUMOylation, transcriptional regulation,  
395 DNA repair and stress response. There is growing evidence that PML interaction with  
396 SUMO might allow partners to localise into PML NBs through SUMO-SIM  
397 interactions<sup>36,52</sup>. We demonstrated that most of the proteins identified by SUMO-ID are  
398 indeed part of the proteome of SUMO-dependent PML NBs and that they are enriched in  
399 SIMs, suggesting SUMO-SIM interaction dependency. It has been proposed that, after  
400 such partner recruitment, proteins might undergo SUMOylation by the PML NB-  
401 localized SUMO machinery that reinforces their sequestration<sup>53</sup>. In fact, PML NBs are,  
402 together with the nuclear rim, the major targets of active SUMOylation<sup>54</sup>. Our data  
403 reinforce this enzyme/substrate co-concentration model as we observed that  
404 SUMOylation machinery enzymes (UBC9, PIAS1, PIAS2, PIAS4 and TRIM28) localize  
405 to PML NBs in a SUMO-dependent manner and 80% of the SUMO-dependent PML  
406 interactors (47 out of 59) are SUMO substrates<sup>9,10</sup>.

407 To compare our list of SUMO-dependent *versus* general interactors of PML, we  
408 performed a TurboID assay for PML, with cells alone or treated with ATO, and identified  
409 271 proteins. ATO induces PML NB formation, subsequent PML SUMOylation, partner  
410 recruitment and finally PML degradation<sup>22,55</sup>. It is used to treat APL, a type of Acute  
411 Myelocytic Leukaemia (AML), which is mainly caused by the t(15;17) translocation that  
412 fuses PML to RARA. Interestingly, two of our SUMO-ID hits, IRF2BP2 and GTF2I, also  
413 form fusion proteins with RARA and cause APL, albeit less commonly than PML  
414 fusions<sup>37,38</sup>. We validated that both localize to PML NBs. While many of the SUMO-ID  
415 candidates show increased peptide intensity in PML NBs after ATO treatment, we  
416 observed that some of them decreased. IRF2BP2 and TRIM24, which has also been linked  
417 to AML<sup>56,57</sup>, showed reduced levels after ATO treatment, suggesting that they might  
418 undergo degradation. In line with this idea, the 11S proteasome components are recruited

419 into mature PML NBs and their localization is enhanced with ATO treatment<sup>58</sup>,  
420 suggesting that mature PML NBs may also act as proteolytic sites. In fact, inhibition of  
421 ubiquitylation accumulates SUMOylated proteins within PML NBs<sup>59</sup>, suggesting that  
422 many clients that are targeted to PML NBs and that are SUMOylated, might undergo  
423 ubiquitylation and degradation. Altogether, these data provide further insight into the role  
424 of PML SUMOylation in NB biology and open new ways of looking at the mechanisms  
425 of ATO in APL treatment.

426         The successful application of SUMO-ID to SALL1, a poorly characterized SUMO  
427 substrate, illustrates the sensitivity and utility of SUMO-ID. Although SALL1  
428 SUMOylation levels are vanishingly low under physiological conditions, SUMO-ID  
429 revealed SUMO-dependent enrichment of the NuRD complex proteins GATAD2A/B,  
430 MTA1/2 and RBBP4/7. The association between SALL1, a transcriptional repressor, and  
431 the NuRD complex, a repressive histone deacetylase complex, has been previously  
432 described<sup>44</sup>. The interaction is mediated by an N-terminal 12 amino acid motif of  
433 SALL1<sup>44</sup>. Once recruited, SUMOylation of SALL1 might serve to stabilize the repressor  
434 complex via SUMO-SIM interactions, with predicted SIMs present in multiple NuRD  
435 complex subunits. As histone SUMOylation is also linked to transcriptional repression<sup>60</sup>,  
436 SUMO-SIM interactions might further reinforce the SALL1/NuRD complex and drive  
437 histone deacetylation at SALL1 targets. In addition, we also found TLE3, DACH1/2 and  
438 ARID3B transcription factors as SUMO-dependent interactors of SALL1. TLE3, a  
439 transcriptional repressor of the Groucho/TLE family, interacts with HDAC2 (another  
440 NuRD complex component) and can regulate acetylation levels<sup>61</sup>. Both TLE3 and the  
441 tumor suppressor DACH1 are negative regulators of Wnt signaling<sup>62,63</sup>. Interestingly,  
442 SALL1 has been shown to enhance Wnt signaling<sup>64</sup>. Perhaps interaction with  
443 SUMOylated SALL1 serves to counteract these negative effects.

444 In summary, we demonstrate here that SUMO-ID, based on the 194/195 Split-  
445 TurboID reconstitution, can facilitate the identification of SUMO-dependent interactions  
446 with a protein of interest. It has little or no background, with high biotinylation activity  
447 when expressed at low levels and with short biotin incubation time. We believe that this  
448 technique improves sensitivity and selectivity when applied to infrequent SUMOylation  
449 events and low-affinity of SUMO-SIM interactions. This strategy can be applied to other  
450 UbL modifications (e.g Ub-ID shown in Figure S5), and the 194/195 Split-TurboID may  
451 be useful for other applications in cell biological studies.

## 452 **METHOD DETAILS**

### 453 **Cell Culture**

454 U2OS (ATCC HTB-96) and HEK293FT (Invitrogen) were cultured at 37°C and 5% CO<sub>2</sub>  
455 in Dulbecco's modified Eagle Medium (DMEM) supplemented with 10% fetal bovine  
456 serum (FBS, Gibco) and 1% penicillin/streptomycin (Gibco). Human telomerase reverse  
457 transcriptase immortalized retinal pigment epithelial cells (hTERT-RPE1, ATCC CRL-  
458 4000) were cultured in DMEM:F12 (Gibco) supplemented with 10% FBS, 2 mM L-  
459 Glutamine and 1% penicillin and streptomycin. Cultured cells were maintained through  
460 20 passages maximum and tested negative for mycoplasma.

### 461 **Cloning**

462 TurboID was a kind gift of A. Ting (Addgene #107171)<sup>29</sup>. PMLIVa<sup>WT</sup> and PMLIVa<sup>3MAS</sup>  
463 were previously described<sup>21</sup>. SUMO1, SUMO2, Ub, RANGAP1 and UBC9 ORFs were  
464 amplified from U2OS cell cDNA by high-fidelity PCR (Platinum SuperFi DNA  
465 Polymerase; Invitrogen). All constructs were generated by standard cloning or by Gibson  
466 Assembly (NEBuilder HiFi Assembly, NEB) using XL10-Gold bacteria (Agilent).  
467 Depending on the construction, plasmid backbones derived from EYFP-N1  
468 (Clontech/Takara), Lenti-Cas9-blast (a kind gift of F. Zhang; Addgene #52962) or TRIPZ

469 (Open Biosystems/Horizon) were used. After assembly, all vectors were validated by  
470 sequencing. Additional details for constructs are described in Table S7. Cloning details  
471 are available upon request.

#### 472 **Lentiviral transduction**

473 Lentiviral expression constructs were packaged in HEK293FT cells using calcium  
474 phosphate transfection of psPAX2 and pMD2.G (kind gifts of D. Trono; Addgene  
475 #12260, 12259) and pTAT (kind gift of P. Fortes; for TRIPZ-based vectors). Transfection  
476 media was removed after 12-18 hours and replaced with fresh media. Lentiviral  
477 supernatants were collected twice (24 hours each), pooled, filtered (0.45  $\mu$ m), and  
478 supplemented with sterile 8.5% PEG6000, 0.3 M NaCl, and incubated 12-18 hours at  
479 4°C. Lentiviral particles were concentrated by centrifugation (1500 x g, 45 minutes, 4°C).  
480 Non-concentrated virus (or dilutions thereof) were used to transduce HEK293FT, and 8x  
481 concentrated virus was used for U2OS and hTERT-RPE1 cells. Drug selection was  
482 performed as follows: 1  $\mu$ g/ml puromycin (Santa Cruz) for U2OS and HEK293FT cells,  
483 5  $\mu$ g/ml for hTERT-RPE1 cells; 5  $\mu$ g/ml blasticidin (Santa Cruz) for U2OS, HEK293FT  
484 and hTERT-RPE1 cells.

#### 485 **CRISPR-Cas9 genome editing**

486 Human PML encodes multiple isoforms, but most differ at the 3' end. To target EYFP  
487 into the first coding exon, shared by most PML isoforms, an sgRNA target site was chosen  
488 (CTGCACCCGCCGATCTCCG) using Broad institute GPP sgRNA Designer<sup>65</sup>.  
489 Custom oligos were cloned into px459v2.0 (a kind gift of F. Zhang; Addgene #62988).  
490 A targeting vector was made by amplifying 5' and 3' homology arms using U2OS  
491 genomic DNA, as well as the EYFP ORF (see Table S7 for oligo details). These fragments  
492 were assembled by overlap extension using high fidelity PCR and the resulting amplicon  
493 was TOPO-cloned and sequence-confirmed. Lipofectamine 2000 (Invitrogen) was used

494 to transfect U2OS with linear targeting vector and px459 encoding SpCas9, puromycin  
495 resistance, and the PML-targeting sgRNA. 24 hours post-transfection, cells were selected  
496 for additional 24-36 hours with 2  $\mu\text{g}/\text{ml}$  puromycin. Cells were plated at low density and  
497 clones were examined by fluorescence microscopy. Clones with clear nuclear body  
498 signals were manually picked and expanded. YFP-PML insertions and copy number were  
499 validated by PCR, sequencing, and Western blotting.

#### 500 **Transient transfections and drug treatments**

501 HEK293FT cells were transiently transfected using calcium phosphate method. U2OS  
502 cells were transiently transfected using Effectene Transfection Reagent (Qiagen). After  
503 24 hours of transfection, cells were treated with biotin (50  $\mu\text{M}$ ; Sigma-Aldrich) for  
504 indicated exposure times. For stably transduced TRIPZ cell lines, induction with  
505 doxycycline (1  $\mu\text{g}/\text{ml}$ ; 24 hours; Sigma-Aldrich) was performed prior to biotin treatment.  
506 ATO (1  $\mu\text{M}$ ; 2 hours; Sigma-Aldrich) treatments were performed (with or without biotin,  
507 depending on experiment) prior to cell lysis or immunostaining.

#### 508 **Western blot analysis**

509 Cells were washed 2x with PBS to remove excess biotin and lysed in highly stringent  
510 washing buffer 5 (WB5; 8 M urea, 1% SDS in 1X PBS) supplemented with 1x protease  
511 inhibitor cocktail (Roche) and 50  $\mu\text{M}$  NEM. Samples were then sonicated and cleared by  
512 centrifugation (25000 x g, 30 minutes, RT). 10-20  $\mu\text{g}$  of protein was loaded for SDS-  
513 PAGE and transferred to nitrocellulose membranes. Blocking was performed in 5% milk  
514 in PBT (1x PBS, 0.1% Tween-20). Casein-based blocking solution was used for anti-  
515 biotin blots (Sigma). Primary antibodies were incubated over-night at 4°C and secondary  
516 antibodies 1 hour at room temperature (RT). Antibodies used: anti-biotin-HRP (1/1000),  
517 anti-Myc (1/1000), anti-alpha-Actinin (1/5000) (Cell Signaling Technology); anti-Flag  
518 (1/1000), anti-GTF2I (1/1000) (Sigma-Aldrich); anti-BirA (1/1000; SinoBiological);

519 anti-IRF2BP2 (1/1000), anti-UBC9 (1/1000), anti-TRIM24 (1/1000), anti-TRIM33  
520 (1/1000), anti-PIAS2 (1/1000), anti-PIAS4 (1/1000), anti-GATAD2B (1/1000), anti-  
521 MTA2 (1/1000), anti-RBBP4 (1/1000), anti-PML (1/1000), anti-GAPDH (1/5000), anti-  
522 beta-Actin (1/5000), anti-alpha-Tubulin (1/5000) (Proteintech); anti-PML (1/1000)  
523 (Bethyl); anti-GFP (1/1000) (SantaCruz); anti-Mouse-HRP, anti-Rabbit-HRP (1:5000)  
524 (Jackson ImmunoResearch). Proteins were detected using Clarity ECL (BioRad) or Super  
525 Signal West Femto (ThermoFisher). Quantification of bands was performed using ImageJ  
526 (v2.0.0-rc-69/1.52n) software and normalized against loading controls (GAPDH, actin,  
527 tubulin or alpha-actinin depending on experiments).

#### 528 **Immunostaining and confocal microscopy**

529 U2OS and HEK293FT cells were seeded on 11 mm coverslips (25,000 cells per well; 24  
530 well plate). HEK293FT coverslips were pre-treated with poly-L-lysine. After washing 3  
531 times with 1x PBS, cells were fixed with 4% PFA supplemented with 0.1% Triton X-100  
532 in PBS for 15 minutes at RT. Then, coverslips were washed 3 times with 1x PBS.  
533 Blocking was performed for 30 minutes at RT in blocking buffer (2% fetal calf serum,  
534 1% BSA in 1x PBS). Primary antibodies were incubated for 2 hours at 37°C and cells  
535 were washed with 1x PBS 3 times. Primary antibodies used: anti-BirA (1/500;  
536 SinoBiological); anti-Myc (1/200; Cell Signaling Technology); anti-GTF2I (1/100;  
537 Sigma-Aldrich); anti-IRF2BP2, anti-UBC9, anti-TRIM24, anti-TRIM33, anti-PIAS2,  
538 anti-PIAS4, anti-CBX4 (all 1/100; Proteintech); anti-B23 (1/100) (Santa Cruz); anti-  
539 SC35 (1/100) (BD biosciences); anti-SUMO2/3 (1/100) (DSHB). Then secondary  
540 antibodies (together with fluorescent streptavidin) were incubated for 1 hour at 37°C,  
541 followed by nuclear staining with DAPI (10 minutes, 300 ng/ml in PBS; Sigma Aldrich).  
542 Antibodies used: anti-Rabbit Alexa Fluor 488, anti-Mouse Alexa Fluor 568, anti-Rabbit  
543 Alexa Fluor 568 (all 1/200; ThermoFisher). Streptavidin Alexa Fluor 594 (1/200, Jackson

544 ImmunoResearch) was used. Fluorescence imaging was performed using confocal  
545 microscopy (Leica SP8 Lightning) with 63x Plan ApoChromat NA1.4. To obtain the  
546 signal histograms for co-localization studies in Fig. 5, we used the plot profile tool in  
547 ImageJ (v2.0.0-rc-69/1.52n).

#### 548 **Pulldown of biotinylated proteins**

549 Cleared lysates from WB5 lysis buffer were adjusted to the same protein concentration  
550 before incubating them with 1/50 ( $v_{\text{beads}}/v_{\text{lysate}}$ ) equilibrated NeutrAvidin-agarose beads  
551 (ThermoFisher) over-night at RT. Due to the high-affinity interaction between biotin and  
552 streptavidin, beads were subjected to stringent series of washes, using the following WBs  
553 ( $v_{\text{WB}}/2v_{\text{lysate}}$ ), all made in 1x PBS: 2x WB1 (8 M urea, 0.25% SDS); 3x WB2 (6 M  
554 Guanidine-HCl); 1x WB3 (6.4 M urea, 1 M NaCl, 0.2% SDS); 3x WB4 (4 M urea, 1 M  
555 NaCl, 10% isopropanol, 10% ethanol and 0.2% SDS); 1x WB1; 1x WB5; and 3x WB6  
556 (2% SDS). Biotinylated proteins were eluted in 80  $\mu\text{l}$  of Elution Buffer (4x Laemmli  
557 buffer, 100 mM DTT) through heating at 99°C for 5 minutes and subsequent vortexing.  
558 Beads were separated by centrifugation (25000 x g, 2 minutes).

#### 559 **Liquid Chromatography Mass Spectrometry (LC-MS/MS)**

560 A stable TRIPZ-MYC-CTurboID<sup>195</sup>-SUMO2nc U2OS cell line was transduced with  
561 either EFS-FLAG-NTurboID<sup>194</sup>-PML<sup>WT</sup> or EFS-FLAG-NTurboID<sup>194</sup>-PML<sup>3MAS</sup> for  
562 PML SUMO-ID experiments. Selection in blasticidin (5  $\mu\text{g}/\text{ml}$ ) and puromycin (1  $\mu\text{g}/\text{ml}$ )  
563 was performed. Expression was validated by Western blot and immunostaining prior to  
564 scale-up for mass spectrometry. The TurboID-PML experiments used U2OS stable cell  
565 lines expressing low and equivalent levels of PML<sup>WT</sup>-TurboID, PML<sup>3MAS</sup>-TurboID and  
566 TurboID alone, selected by blasticidin (5  $\mu\text{g}/\text{ml}$ ), and treated or not with ATO for 2 hours.  
567 For SALL1 SUMO-ID, a HEK293FT stable cell line expressing low levels of TRIPZ-  
568 MYC-CTurboID<sup>195</sup>-SUMO2nc (selected with puromycin, 1  $\mu\text{g}/\text{ml}$ ) was transiently



569 transfected with EFS-FLAG-NTurboID<sup>194</sup>-SALL1<sup>WT</sup> or EFS-FLAG-NTurboID<sup>194</sup>-  
570 SALL1<sup>ΔSUMO</sup> (a mutant carrying Lys>Arg mutations at K571, K592, K982, K1086).  
571 Three independent pulldown experiments (8 x 10<sup>7</sup> cells per replicate, 8 ml of lysis) were  
572 analyzed by LC-MS/MS.

573 Samples eluted from the NeutrAvidin beads were separated in SDS-PAGE (50% loaded)  
574 and stained with Sypro Ruby (Invitrogen) according to manufacturer's instructions. Gel  
575 lanes were sliced into 3 pieces as accurately as possible to guarantee reproducibility. The  
576 slices were subsequently washed in milli-Q water. Reduction and alkylation were  
577 performed using dithiothreitol (10 mM DTT in 50 mM ammonium bicarbonate) at 56°C  
578 for 20 min, followed by iodoacetamide (50 mM chloroacetamide in 50 mM ammonium  
579 bicarbonate) for another 20 minutes in the dark. Gel pieces were dried and incubated with  
580 trypsin (12.5 µg/ml in 50 mM ammonium bicarbonate) for 20 minutes on ice. After  
581 rehydration, the trypsin supernatant was discarded. Gel pieces were hydrated with 50 mM  
582 ammonium bicarbonate, and incubated overnight at 37°C. After digestion, acidic peptides  
583 were cleaned with TFA 0.1% and dried out in a RVC2 25 speedvac concentrator (Christ).  
584 Peptides were resuspended in 10 µl 0.1% formic acid (FA) and sonicated for 5 min prior  
585 to analysis.

586 PML samples were analyzed in a novel hybrid trapped ion mobility spectrometry –  
587 quadrupole time of flight mass spectrometer (timsTOF Pro with PASEF, Bruker  
588 Daltonics) coupled online to a nanoElute liquid chromatograph (Bruker). This mass  
589 spectrometer takes advantage of a novel scan mode termed parallel accumulation – serial  
590 fragmentation (PASEF). Sample (200 ng) was directly loaded in a 15 cm Bruker  
591 nanoelute FIFTEEN C18 analytical column (Bruker) and resolved at 400 nl/min with a  
592 100 minutes gradient. Column was heated to 50°C using an oven.

593 For the analysis of SALL1 samples peptides were eluted from stage-tips in a solvent  
594 composed of deionized water/acetonitrile/FA at a ratio of 50/50/0.1 v/v/v. Peptides were  
595 lyophilized and dissolved in solvent A composed of deionized water/FA at a ratio of  
596 100/0.1 v/v and subsequently analyzed by on-line C18 nano-HPLC MS/MS with a system  
597 consisting of an Ultimate 3000 nano gradient HPLC system (ThermoFisher), and an  
598 Exploris 480 mass spectrometer (ThermoFisher). Fractions were loaded onto a cartridge  
599 precolumn (5 mm x ID 300  $\mu$ m, C18 PepMap 100 A, 5  $\mu$ m particles (ThermoFisher)),  
600 using solvent A at a flow of 10  $\mu$ l/minute for 3 minutes and eluted via a homemade  
601 analytical nano-HPLC column (50 cm  $\times$  ID 75  $\mu$ m; Reprosil-Pur C18-AQ 1.9  $\mu$ m, 120 A;  
602 Dr. Maisch GmbH). The gradient was run from 2% to 40% solvent B  
603 (water/acetonitrile/FA at a ratio of 20/80/0.1 v/v/v) in 40 minutes. The nano-HPLC  
604 column was drawn to a tip of  $\sim$ 10  $\mu$ m and acted as the electrospray needle of the MS  
605 source. The temperature of the nano-HPLC column was set to 50°C (Sonation GmbH).  
606 The mass spectrometer was operated in data-dependent MS/MS mode for a cycle time of  
607 3 seconds, with a HCD collision energy at 28 V and recording of the MS2 spectrum in  
608 the orbitrap, with a quadrupole isolation width of 1.6 Da. In the master scan (MS1) the  
609 resolution was set to 60,000, and the scan range was set to 300-1600, at an Automatic  
610 Gain Control (AGC) target of  $3 \times 10^6$  with automated fill time. A lock mass correction on  
611 the background ion  $m/z=445.12$  was used. Precursors were dynamically excluded after  
612  $n=1$  with an exclusion duration of 30 seconds, and with a precursor range of 10 ppm.  
613 Charge states 2-6 were included. For MS2 the first mass was set to 120 Da, and the MS2  
614 scan resolution was 30,000 at an AGC target of 75,000 with automated fill time.

### 615 **Mass Spectrometry data analysis**

616 Raw MS files were analyzed using MaxQuant (version 1.6.17)<sup>66</sup> matching to a human  
617 proteome (Uniprot filtered reviewed *H. sapiens* proteome, UP000005640) with a

618 maximum of 4 missed cleavages and with precursor and fragment tolerances of 20 ppm  
619 and 0.05 Da. Label-Free Quantification was enabled with default values except for a ratio  
620 count set to 1. Slices corresponding to same lanes were considered as fractions.  
621 Biotinylation on lysine and on protein N-term was included as a variable modification for  
622 SALL1 SUMO-ID data, and biotinylated peptides were set to be included for  
623 quantification. Matching between runs and matching unidentified features were enabled.  
624 Only proteins identified with at least one peptide at FDR<1% were considered for further  
625 analysis. Data were loaded onto the Perseus platform (version 1.6.14)<sup>67</sup> and further  
626 processed (Log2 transformation, imputation, median normalization when needed). A t-  
627 test was applied in order to determine the statistical significance of the differences  
628 detected. Proteins detected with at least 2 peptides (except when otherwise specified) and  
629 in at least 2 of the 3 replicates were included.

630 Network analysis was performed using the STRING app version 1.4.2<sup>68</sup> in Cytoscape  
631 version 3.7.2<sup>69</sup>, with a high confidence interaction score (0.7). Transparency and width of  
632 the edges were continuously mapped to the String score (text mining, databases,  
633 coexpression, experiments, fusion, neighborhood and cooccurrence). The Molecular  
634 COMplex DETection (MCODE) plug-in version 1.5.1<sup>70</sup> was used to identify highly  
635 connected subclusters of proteins (degree cutoff of 2; Cluster finding: Haircut; Node score  
636 cutoff of 0.2; K-Core of 2; Max. Depth of 100). Gene ontology analysis was performed  
637 using g:Profiler web server<sup>71</sup>.

638 The mass spectrometry proteomics data corresponding to PML SUMO-ID, PML-  
639 TurboID and SALL1 SUMO-ID experiments have been deposited to the  
640 ProteomeXchange Consortium via the PRIDE partner repository<sup>72</sup> with the dataset  
641 identifiers PXD021770, PXD021809 and PXD021923, respectively.

## 642 **SIM enrichment analysis**

643 A thousand lists with the same number of proteins as PML SUMO-ID list (59) have been  
644 randomly generated from the human proteome (Uniprot filtered reviewed *H. sapiens*  
645 proteome, UP000005640). All those lists have been analyzed by adapting the script  
646 from<sup>73</sup> and running it on Python version 2.7.5, to obtain the content and number of SIM  
647 motifs per protein ( $\psi$ - $\psi$ -X- $\psi$ ;  $\psi$ -X- $\psi$ - $\psi$ ;  $\psi$ - $\psi$ - $\psi$ ; where  $\psi$  is either a L, I or V and X is  
648 any amino acid) and the number of SIMs per thousand of amino acids (STAA). After  
649 removing three outliers (lists 46, 782, 794; ROUT method, Q=1%), STAA values from  
650 the random lists were normalized to Log2 and validated for Gaussian distribution  
651 (d'Agostino and Pearson normality test). Enrichments were computed using R software  
652 v3.6.0 and calculated as the ratio between PML SUMO-ID STAA value and the median  
653 of STAA values from the random lists. Empirical p-values have been calculated by  
654 counting the number of random lists whose STAA values were as extreme as the PML  
655 SUMO-ID STAA value. The raw data from the SIM enrichment analysis and the script  
656 can be found in Table S5 and Supplementary Source 1, respectively.

## 657 **ACKNOWLEDGEMENTS**

658 We are thankful to Iraide Escobes for her work in the Proteomics Platform at CIC  
659 bioGUNE and Arnoud de Ru in the Center for Proteomics and Metabolomics at the  
660 LUMC. RB and ACOV acknowledge funding by the grant 765445-EU (UbiCODE  
661 Program). RB acknowledges funding by grants BFU2017-84653-P (MINECO/FEDER,  
662 EU), SEV-2016-0644 (Severo Ochoa Excellence Program), SAF2017-90900-REDT  
663 (UBIRed Program) and IT1165-19 (Basque Country Government). Additional support  
664 was provided by the Department of Industry, Tourism, and Trade of the Basque Country  
665 Government (Elkartek Research Programs) and by the Innovation Technology  
666 Department of the Bizkaia County. FE is at Proteomics Platform, member of ProteoRed-

667 ISCIII (PT13/0001/0027). FE and AMA acknowledge CIBERehd. AC acknowledges the  
668 Basque Department of education (IKERTALDE IT1106-16), the MCIU (PID2019-  
669 108787RB-I00 (FEDER/EU), Severo Ochoa Excellence Accreditation SEV-2016-0644,  
670 Excellence Networks RED2018-102769-T), the AECC (GCTRA18006CARR), La Caixa  
671 Foundation (ID 100010434), under the agreement LCF/PR/HR17, and the European  
672 Research Council (Starting Grant 336343, PoC 754627, Consolidator grant 819242).  
673 CIBERONC was co-funded with FEDER funds. UM acknowledges the Basque  
674 Government Department of Education (IT1165-19) and the Spanish MCIU (SAF2016-  
675 76898-P (FEDER/EU)).

#### 676 **AUTHOR CONTRIBUTIONS**

677 O.B.-G., J.D.S. and R.B designed experiments, analyzed data and wrote the manuscript.  
678 O.B.-G., F.T., V.M., I.C., A.R.C., C.P., M.A., I.I. and J.D.S. developed experimental  
679 protocols and performed experiments. A.C., A.M.A., F.E., U.M. and A.C.O.V. provided  
680 scientific resources.

#### 681 **COMPETING INTERESTS**

682 The authors declare no competing interests.

#### 683 **REFERENCES**

- 684 1. Flotho, A. & Melchior, F. Sumoylation: a regulatory protein modification in  
685 health and disease. *Annu Rev Biochem* **82**, 357-385 (2013).
- 686 2. Gareau, J.R. & Lima, C.D. The SUMO pathway: emerging mechanisms that  
687 shape specificity, conjugation and recognition. *Nat Rev Mol Cell Biol* **11**, 861-  
688 871 (2010).

- 689 3. Ullmann, R., Chien, C.D., Avantaggiati, M.L. & Muller, S. An acetylation  
690 switch regulates SUMO-dependent protein interaction networks. *Mol Cell* **46**,  
691 759-770 (2012).
- 692 4. Vertegaal, A.C. SUMO chains: polymeric signals. *Biochem Soc Trans* **38**, 46-49  
693 (2010).
- 694 5. Aillet, F. *et al.* Heterologous SUMO-2/3-ubiquitin chains optimize  
695 IkappaBalpha degradation and NF-kappaB activity. *PLoS One* **7**, e51672 (2012).
- 696 6. Pichler, A., Fatouros, C., Lee, H. & Eisenhardt, N. SUMO conjugation - a  
697 mechanistic view. *Biomol Concepts* **8**, 13-36 (2017).
- 698 7. Talamillo, A. *et al.* The role of SUMOylation during development. *Biochem Soc*  
699 *Trans* **48**, 463-478 (2020).
- 700 8. Talamillo, A. *et al.* SUMOylation in the control of cholesterol homeostasis.  
701 *Open Biol* **10**, 200054 (2020).
- 702 9. Hendriks, I.A. *et al.* Site-specific mapping of the human SUMO proteome  
703 reveals co-modification with phosphorylation. *Nat Struct Mol Biol* **24**, 325-336  
704 (2017).
- 705 10. Hendriks, I.A. & Vertegaal, A.C. A comprehensive compilation of SUMO  
706 proteomics. *Nat Rev Mol Cell Biol* **17**, 581-595 (2016).
- 707 11. Kerscher, O. SUMO junction-what's your function? New insights through  
708 SUMO-interacting motifs. *EMBO Rep* **8**, 550-555 (2007).
- 709 12. Kumar, R., Gonzalez-Prieto, R., Xiao, Z., Verlaan-de Vries, M. & Vertegaal,  
710 A.C.O. The STUbL RNF4 regulates protein group SUMOylation by targeting  
711 the SUMO conjugation machinery. *Nat Commun* **8**, 1809 (2017).

- 712 13. Sriramachandran, A.M. *et al.* Arkadia/RNF111 is a SUMO-targeted ubiquitin  
713 ligase with preference for substrates marked with SUMO1-capped SUMO2/3  
714 chain. *Nat Commun* **10**, 3678 (2019).
- 715 14. Werner, A., Flotho, A. & Melchior, F. The RanBP2/RanGAP1\*SUMO1/Ubc9  
716 complex is a multisubunit SUMO E3 ligase. *Mol Cell* **46**, 287-298 (2012).
- 717 15. Eskiw, C.H., Dellaire, G. & Bazett-Jones, D.P. Chromatin contributes to  
718 structural integrity of promyelocytic leukemia bodies through a SUMO-1-  
719 independent mechanism. *J Biol Chem* **279**, 9577-9585 (2004).
- 720 16. Wang, J. *et al.* Promyelocytic leukemia nuclear bodies associate with  
721 transcriptionally active genomic regions. *J Cell Biol* **164**, 515-526 (2004).
- 722 17. Bernardi, R. & Pandolfi, P.P. Structure, dynamics and functions of  
723 promyelocytic leukaemia nuclear bodies. *Nat Rev Mol Cell Biol* **8**, 1006-1016  
724 (2007).
- 725 18. Lallemand-Breitenbach, V. & de The, H. PML nuclear bodies: from architecture  
726 to function. *Curr Opin Cell Biol* **52**, 154-161 (2018).
- 727 19. Jensen, K., Shiels, C. & Freemont, P.S. PML protein isoforms and the  
728 RBCC/TRIM motif. *Oncogene* **20**, 7223-7233 (2001).
- 729 20. Zhang, X.W. *et al.* Arsenic trioxide controls the fate of the PML-RARalpha  
730 oncoprotein by directly binding PML. *Science* **328**, 240-243 (2010).
- 731 21. Shen, T.H., Lin, H.K., Scaglioni, P.P., Yung, T.M. & Pandolfi, P.P. The  
732 Mechanisms of PML-Nuclear Body Formation. *Mol Cell* **24**, 805 (2006).
- 733 22. Tatham, M.H. *et al.* RNF4 is a poly-SUMO-specific E3 ubiquitin ligase required  
734 for arsenic-induced PML degradation. *Nat Cell Biol* **10**, 538-546 (2008).
- 735 23. Kim, D.I. & Roux, K.J. Filling the Void: Proximity-Based Labeling of Proteins  
736 in Living Cells. *Trends Cell Biol* **26**, 804-817 (2016).

- 737 24. Choi-Rhee, E., Schulman, H. & Cronan, J.E. Promiscuous protein biotinylation  
738 by *Escherichia coli* biotin protein ligase. *Protein Sci* **13**, 3043-3050 (2004).
- 739 25. Kim, D.I. *et al.* Probing nuclear pore complex architecture with proximity-  
740 dependent biotinylation. *Proc Natl Acad Sci U S A* **111**, E2453-2461 (2014).
- 741 26. Roux, K.J., Kim, D.I., Raida, M. & Burke, B. A promiscuous biotin ligase  
742 fusion protein identifies proximal and interacting proteins in mammalian cells. *J*  
743 *Cell Biol* **196**, 801-810 (2012).
- 744 27. Coyaud, E. *et al.* BioID-based Identification of Skp Cullin F-box (SCF)beta-  
745 TrCP1/2 E3 Ligase Substrates. *Mol Cell Proteomics* **14**, 1781-1795 (2015).
- 746 28. Dho, S.E. *et al.* Proximity interactions of the ubiquitin ligase Mind bomb 1  
747 reveal a role in regulation of epithelial polarity complex proteins. *Sci Rep* **9**,  
748 12471 (2019).
- 749 29. Branon, T.C. *et al.* Efficient proximity labeling in living cells and organisms  
750 with TurboID. *Nat Biotechnol* **36**, 880-887 (2018).
- 751 30. Schopp, I.M. *et al.* Split-BioID a conditional proteomics approach to monitor the  
752 composition of spatiotemporally defined protein complexes. *Nat Commun* **8**,  
753 15690 (2017).
- 754 31. Cho, K.F. *et al.* Split-TurboID enables contact-dependent proximity labeling in  
755 cells. *Proc Natl Acad Sci U S A* **117**, 12143-12154 (2020).
- 756 32. Banaszynski, L.A., Liu, C.W. & Wandless, T.J. Characterization of the  
757 FKBP.rapamycin.FRB ternary complex. *J Am Chem Soc* **127**, 4715-4721  
758 (2005).
- 759 33. Bekes, M. *et al.* The dynamics and mechanism of SUMO chain deconjugation  
760 by SUMO-specific proteases. *J Biol Chem* **286**, 10238-10247 (2011).



- 761 34. Shen, T.H., Lin, H.K., Scaglioni, P.P., Yung, T.M. & Pandolfi, P.P. The  
762 mechanisms of PML-nuclear body formation. *Mol Cell* **24**, 331-339 (2006).
- 763 35. Rabellino, A. *et al.* The SUMO E3-ligase PIAS1 regulates the tumor suppressor  
764 PML and its oncogenic counterpart PML-RARA. *Cancer Res* **72**, 2275-2284  
765 (2012).
- 766 36. Zhu, J. *et al.* Small ubiquitin-related modifier (SUMO) binding determines  
767 substrate recognition and paralog-selective SUMO modification. *J Biol Chem*  
768 **283**, 29405-29415 (2008).
- 769 37. Li, J. *et al.* GTF2I-RARA is a novel fusion transcript in a t(7;17) variant of acute  
770 promyelocytic leukaemia with clinical resistance to retinoic acid. *Br J Haematol*  
771 **168**, 904-908 (2015).
- 772 38. Yin, C.C. *et al.* Identification of a novel fusion gene, IRF2BP2-RARA, in acute  
773 promyelocytic leukemia. *J Natl Compr Canc Netw* **13**, 19-22 (2015).
- 774 39. Banani, S.F. *et al.* Compositional Control of Phase-Separated Cellular Bodies.  
775 *Cell* **166**, 651-663 (2016).
- 776 40. Chung, I., Osterwald, S., Deeg, K.I. & Rippe, K. PML body meets telomere: the  
777 beginning of an ALternate ending? *Nucleus* **3**, 263-275 (2012).
- 778 41. Van Damme, E., Laukens, K., Dang, T.H. & Van Ostade, X. A manually curated  
779 network of the PML nuclear body interactome reveals an important role for  
780 PML-NBs in SUMOylation dynamics. *Int J Biol Sci* **6**, 51-67 (2010).
- 781 42. Netzer, C., Bohlander, S.K., Rieger, L., Muller, S. & Kohlhase, J. Interaction of  
782 the developmental regulator SALL1 with UBE2I and SUMO-1. *Biochem*  
783 *Biophys Res Commun* **296**, 870-876 (2002).
- 784 43. Pirone, L. *et al.* A comprehensive platform for the analysis of ubiquitin-like  
785 protein modifications using in vivo biotinylation. *Sci Rep* **7**, 40756 (2017).

- 786 44. Lauberth, S.M. & Rauchman, M. A conserved 12-amino Acid motif in Sall1  
787 recruits the nucleosome remodeling and deacetylase corepressor complex. *The*  
788 *Journal of biological chemistry* **281**, 23922-23931 (2006).
- 789 45. Hendriks, I.A. & Vertegaal, A.C. A high-yield double-purification proteomics  
790 strategy for the identification of SUMO sites. *Nat Protoc* **11**, 1630-1649 (2016).
- 791 46. Becker, J. *et al.* Detecting endogenous SUMO targets in mammalian cells and  
792 tissues. *Nat Struct Mol Biol* **20**, 525-531 (2013).
- 793 47. Le Boulch, M., Brossard, A., Le Dez, G., Leon, S. & Rabut, G. Sensitive  
794 detection of protein ubiquitylation using a protein fragment complementation  
795 assay. *J Cell Sci* **133** (2020).
- 796 48. Sung, M.K. *et al.* Genome-wide bimolecular fluorescence complementation  
797 analysis of SUMO interactome in yeast. *Genome Res* **23**, 736-746 (2013).
- 798 49. Fang, D. & Kerppola, T.K. Ubiquitin-mediated fluorescence complementation  
799 reveals that Jun ubiquitinated by Itch/AIP4 is localized to lysosomes. *Proc Natl*  
800 *Acad Sci U S A* **101**, 14782-14787 (2004).
- 801 50. Komiya, M. *et al.* A genetic screen to discover SUMOylated proteins in living  
802 mammalian cells. *Sci Rep* **7**, 17443 (2017).
- 803 51. Croucher, D.R. *et al.* Bimolecular complementation affinity purification  
804 (BiCAP) reveals dimer-specific protein interactions for ERBB2 dimers. *Sci*  
805 *Signal* **9**, ra69 (2016).
- 806 52. Lin, D.Y. *et al.* Role of SUMO-interacting motif in Daxx SUMO modification,  
807 subnuclear localization, and repression of sumoylated transcription factors. *Mol*  
808 *Cell* **24**, 341-354 (2006).
- 809 53. Sahin, U. *et al.* Oxidative stress-induced assembly of PML nuclear bodies  
810 controls sumoylation of partner proteins. *J Cell Biol* **204**, 931-945 (2014).

- 811 54. Saitoh, N. *et al.* In situ SUMOylation analysis reveals a modulatory role of  
812 RanBP2 in the nuclear rim and PML bodies. *Exp Cell Res* **312**, 1418-1430  
813 (2006).
- 814 55. Lallemand-Breitenbach, V. *et al.* Arsenic degrades PML or PML-RARalpha  
815 through a SUMO-triggered RNF4/ubiquitin-mediated pathway. *Nat Cell Biol* **10**,  
816 547-555 (2008).
- 817 56. Gechijian, L.N. *et al.* Functional TRIM24 degrader via conjugation of  
818 ineffectual bromodomain and VHL ligands. *Nat Chem Biol* **14**, 405-412 (2018).
- 819 57. Li, C., Xin, H., Shi, Y. & Mu, J. Knockdown of TRIM24 suppresses growth and  
820 induces apoptosis in acute myeloid leukemia through downregulation of  
821 Wnt/GSK-3beta/beta-catenin signaling. *Hum Exp Toxicol* **39**, 1725-1736 (2020).
- 822 58. Lallemand-Breitenbach, V. *et al.* Role of promyelocytic leukemia (PML)  
823 sumolation in nuclear body formation, 11S proteasome recruitment, and As2O3-  
824 induced PML or PML/retinoic acid receptor alpha degradation. *J Exp Med* **193**,  
825 1361-1371 (2001).
- 826 59. Sha, Z., Blyszcz, T., Gonzalez-Prieto, R., Vertegaal, A.C.O. & Goldberg, A.L.  
827 Inhibiting ubiquitination causes an accumulation of SUMOylated newly  
828 synthesized nuclear proteins at PML bodies. *J Biol Chem* **294**, 15218-15234  
829 (2019).
- 830 60. Shio, Y. & Eisenman, R.N. Histone sumoylation is associated with  
831 transcriptional repression. *Proc Natl Acad Sci U S A* **100**, 13225-13230 (2003).
- 832 61. Jangal, M. *et al.* The transcriptional co-repressor TLE3 suppresses basal  
833 signaling on a subset of estrogen receptor alpha target genes. *Nucleic Acids Res*  
834 **42**, 11339-11348 (2014).

- 835 62. Flack, J.E., Mieszczanek, J., Novcic, N. & Bienz, M. Wnt-Dependent  
836 Inactivation of the Groucho/TLE Co-repressor by the HECT E3 Ubiquitin  
837 Ligase Hyd/UBR5. *Mol Cell* **67**, 181-193 e185 (2017).
- 838 63. Yan, W. *et al.* Epigenetic regulation of DACH1, a novel Wnt signaling  
839 component in colorectal cancer. *Epigenetics* **8**, 1373-1383 (2013).
- 840 64. Sato, A. *et al.* Sall1, a causative gene for Townes-Brocks syndrome, enhances  
841 the canonical Wnt signaling by localizing to heterochromatin. *Biochem Biophys*  
842 *Res Commun* **319**, 103-113 (2004).
- 843 65. Doench, J.G. *et al.* Optimized sgRNA design to maximize activity and minimize  
844 off-target effects of CRISPR-Cas9. *Nat Biotechnol* **34**, 184-191 (2016).
- 845 66. Cox, J. & Mann, M. MaxQuant enables high peptide identification rates,  
846 individualized p.p.b.-range mass accuracies and proteome-wide protein  
847 quantification. *Nat Biotechnol* **26**, 1367-1372 (2008).
- 848 67. Tyanova, S. *et al.* The Perseus computational platform for comprehensive  
849 analysis of (prote)omics data. *Nat Methods* **13**, 731-740 (2016).
- 850 68. Snel, B., Lehmann, G., Bork, P. & Huynen, M.A. STRING: a web-server to  
851 retrieve and display the repeatedly occurring neighbourhood of a gene. *Nucleic*  
852 *Acids Res* **28**, 3442-3444 (2000).
- 853 69. Shannon, P. *et al.* Cytoscape: a software environment for integrated models of  
854 biomolecular interaction networks. *Genome Res* **13**, 2498-2504 (2003).
- 855 70. Bader, G.D. & Hogue, C.W. An automated method for finding molecular  
856 complexes in large protein interaction networks. *BMC Bioinformatics* **4**, 2  
857 (2003).
- 858 71. Reimand, J. *et al.* g:Profiler-a web server for functional interpretation of gene  
859 lists (2016 update). *Nucleic Acids Res* **44**, W83-89 (2016).

- 860 72. Vizcaino, J.A. *et al.* 2016 update of the PRIDE database and its related tools.  
861 *Nucleic Acids Res* **44**, 11033 (2016).
- 862 73. Sun, H. & Hunter, T. Poly-small ubiquitin-like modifier (PolySUMO)-binding  
863 proteins identified through a string search. *J Biol Chem* **287**, 42071-42083  
864 (2012).
- 865 74. Weaver, L.H., Kwon, K., Beckett, D. & Matthews, B.W. Corepressor-induced  
866 organization and assembly of the biotin repressor: a model for allosteric  
867 activation of a transcriptional regulator. *Proc Natl Acad Sci U S A* **98**, 6045-  
868 6050 (2001).
- 869 75. Sehnal, D., Rose, A.S., Koča, J., Burley, S.K. & Velankar, S. in Proceedings of  
870 the Workshop on Molecular Graphics and Visual Analysis of Molecular Data  
871 29–33 (Eurographics Association, Brno, Czech Republic; 2018).
- 872
- 873

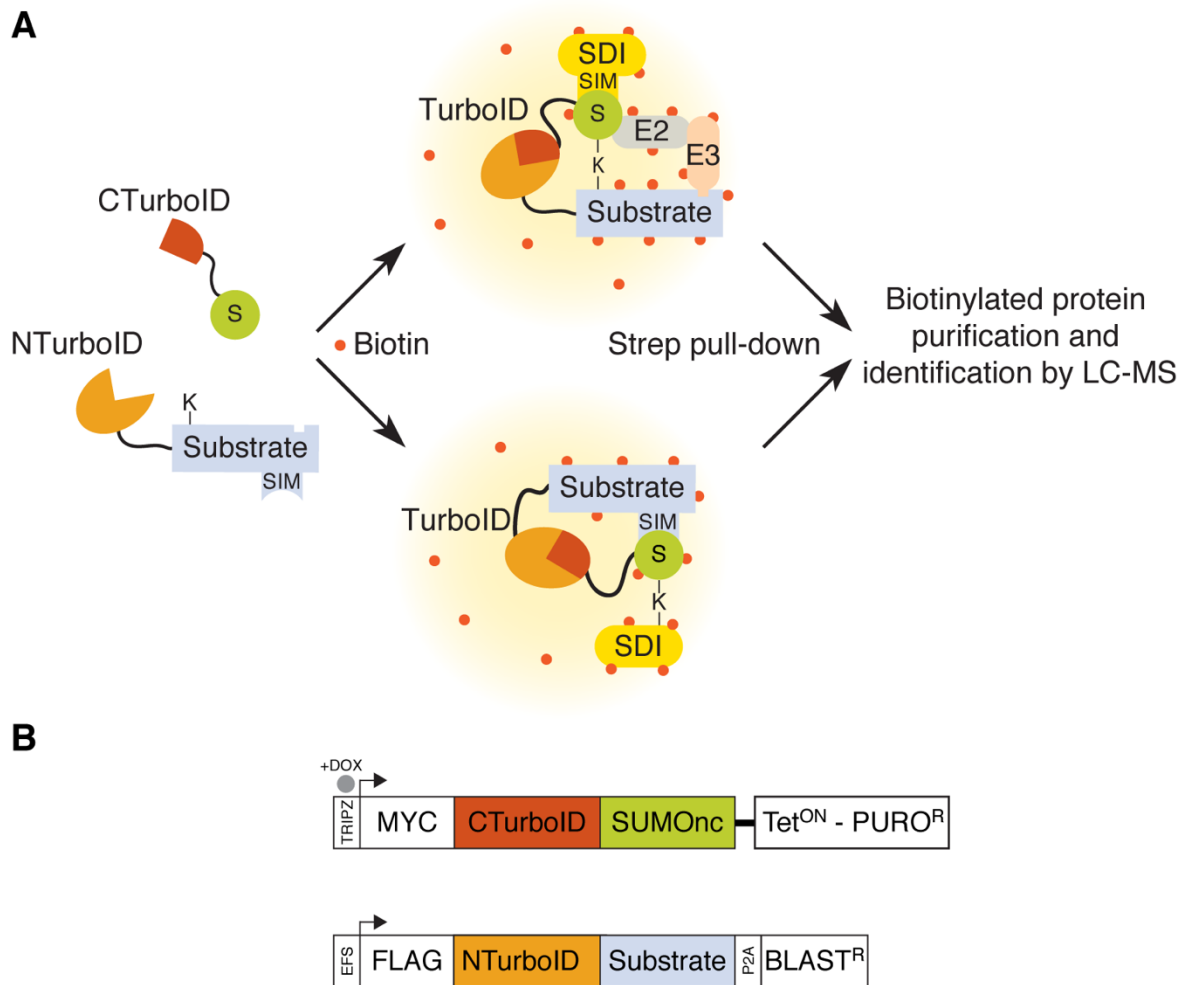

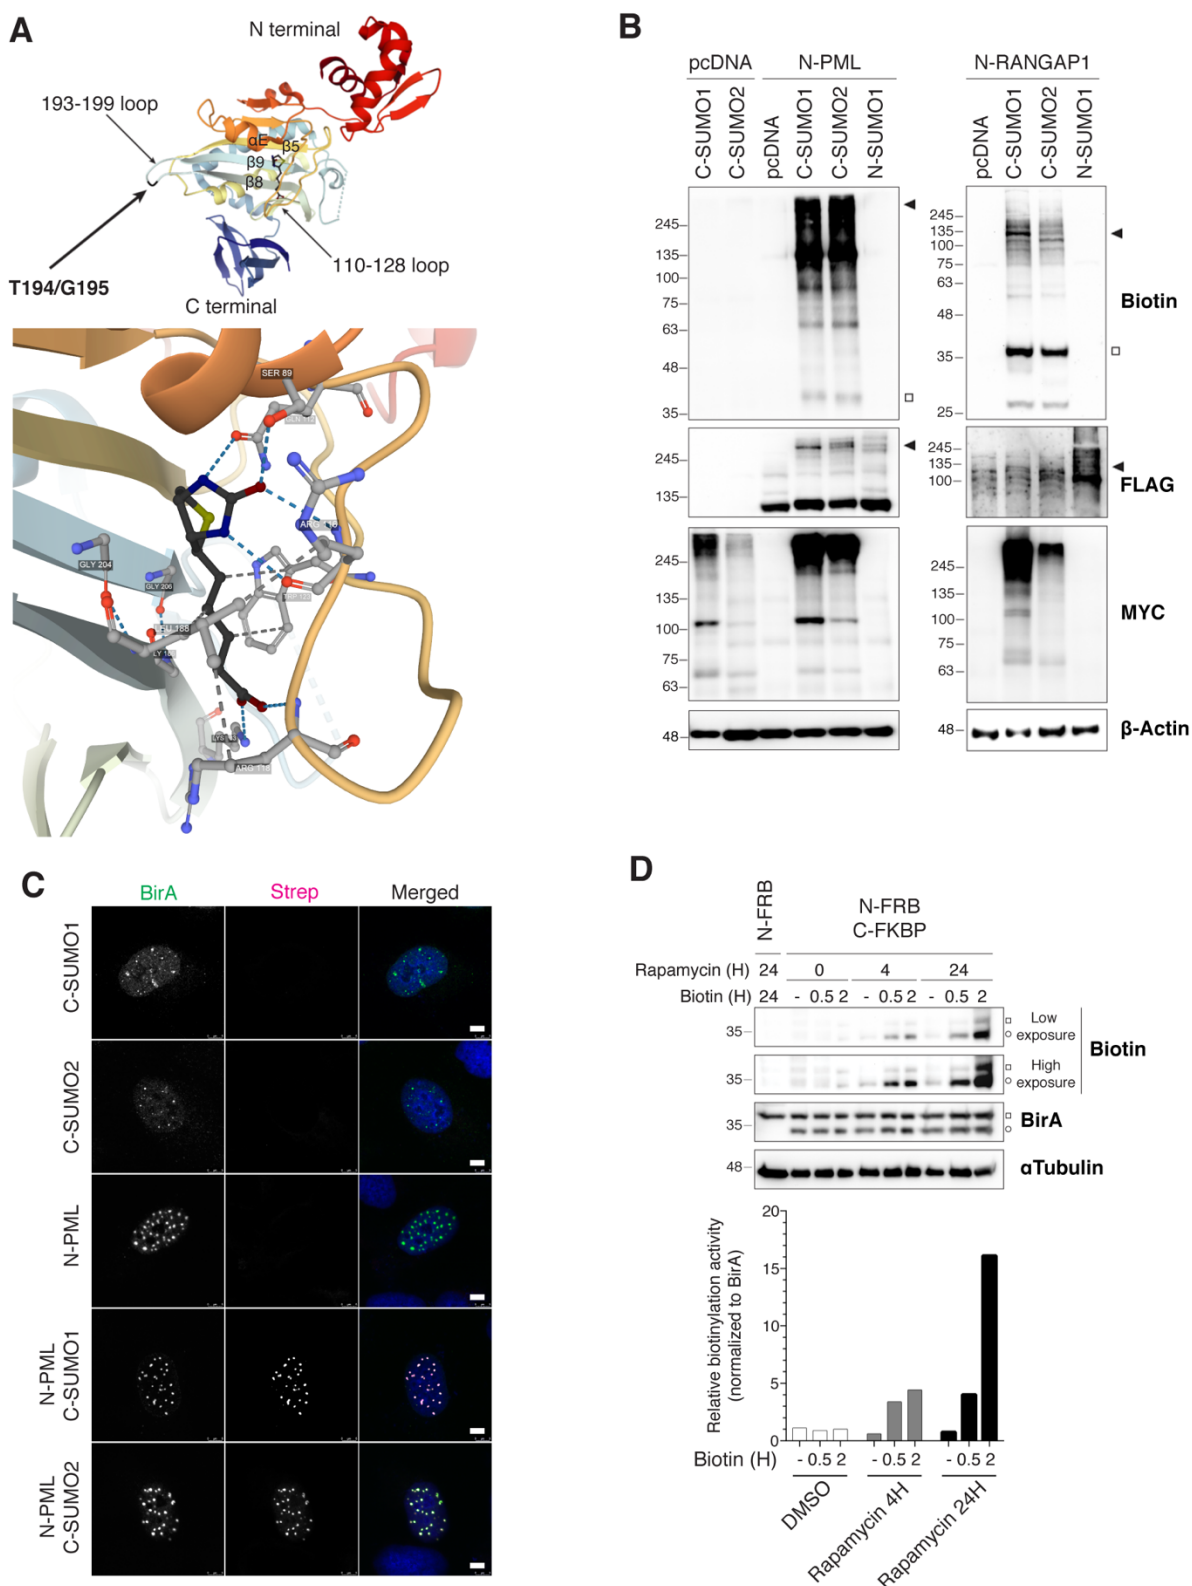

882

883 **Figure 2: T194/G195 Split-TurboID is suitable for SUMO-ID studies.** (A) Structure  
 884 of the *E. coli* BirA with bound biotin (PDB ID: 1HXD<sup>74,75</sup>), depicting the T194/G195  
 885 split point and the BirA-Biotin interaction. T194/G195 split point breaks the 193-199 loop

886 that connects the biotin-interacting  $\beta$ 8 and  $\beta$ 9 strands (see File S1). **(B)** Western blot of  
887 HEK293FT cells that were transiently transfected with combinations of the FLAG-  
888 NTurboID<sup>194</sup> (N) or MYC-CTurboID<sup>195</sup> (C) fused to PMLIVa, RANGAP1 or SUMO1/2  
889 and treated with 50  $\mu$ M of biotin for 16 hours. Black arrowheads indicate SUMO-ID  
890 activity derived from MYC-CTurboID<sup>195</sup>-SUMOylated FLAG-NTurboID<sup>194</sup>-substrates.  
891 White squares indicate biotinylated free MYC-CTurboID<sup>195</sup>-SUMOs. Neither FLAG-  
892 NTurboID<sup>194</sup> nor MYC-CTurboID<sup>195</sup> showed any detectable background biotinylating  
893 activity. **(C)** Immunostainings of transiently transfected U2OS cells treated with 50  $\mu$ M  
894 of biotin for 16 hours, showing the fragment-complementation dependency of SUMO-ID  
895 and its correct localization within the cell, enriched at PML NBs as expected for  
896 SUMOylated PML. Nuclei are stained with DAPI (blue) and biotinylated material with  
897 fluorescent streptavidin (Strep, magenta). BirA antibody recognizes both NTurboID<sup>194</sup>  
898 and CTurboID<sup>195</sup> (green). Black and white panels show the single green and magenta  
899 channels. Scale bar: 5  $\mu$ m. **(D)** Western blot of HEK293FT stable cells for NTurboID<sup>194</sup>-  
900 FRB alone or in combination with CTurboID<sup>195</sup>-FKBP, treated or not with 1  $\mu$ g/mL of  
901 rapamycin and 50  $\mu$ M of biotin at indicated time-points. BirA antibody recognizes both  
902 NTurboID<sup>194</sup> and CTurboID<sup>195</sup>. White squares and circles indicate NTurboID<sup>194</sup>-FRB and  
903 CTurboID<sup>195</sup>-FKBP, respectively. Self-biotinylating activity of the reconstituted TurboID  
904 was measured and normalized to expression levels (BirA blot). Molecular weight markers  
905 are shown to the left of the blots in kDa.

906



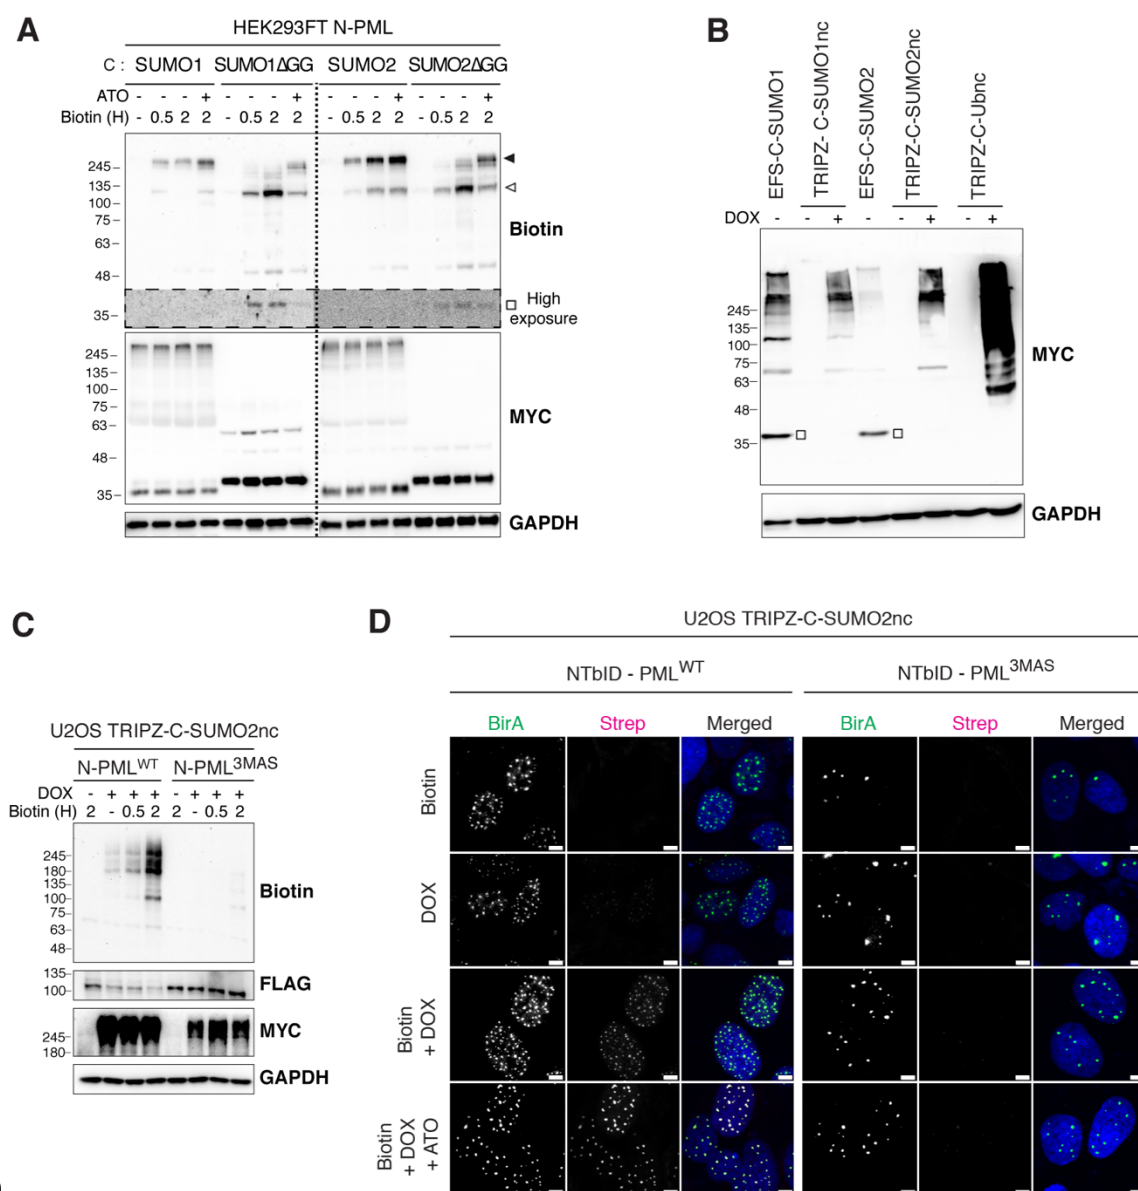

9

908 **Figure 3: SUMO-ID is specific for SUMO-dependent interactions.** (A) Western blot  
 909 of HEK293FT FLAG-NTurboID<sup>194</sup>-PMLIVa stable cell line transfected with different  
 910 combinations of MYC-CTurboID<sup>195</sup> (C) and SUMO<sup>WT</sup> or SUMO<sup>AGG</sup>. Cells were treated  
 911 or not with 1  $\mu$ M of ATO for 2 hours and 50  $\mu$ M of biotin at indicated time points. White  
 912 square indicates biotinylation of unconjugated MYC-CTurboID<sup>195</sup>- SUMO<sup>AGG</sup>. White  
 913 arrowhead points to SUMO-SIM interaction mediated SUMO-ID. Black arrowhead  
 914 shows PML-SUMOylation derived SUMO-ID. (B) Western blot of HEK293FT  
 915 transfected with constitutive MYC-CTurboID<sup>195</sup>-SUMO1/2 or doxycycline-inducible

916 and isopeptidase-cleavage resistant (nc) MYC-CTurboID<sup>195</sup>-SUMO1/2nc or MYC-  
917 CTurboID<sup>195</sup>-Ubnc. Doxycycline was added or not at 1 µg/mL for 24 hours. White  
918 squares point to free/unconjugated MYC-CTurboID<sup>195</sup>-SUMOs. **(C)** Western blot of  
919 U2OS double stable cell lines for FLAG-NTurboID<sup>194</sup>-PMLIVa<sup>WT</sup> or the SUMO/SIM  
920 mutant FLAG-NTurboID<sup>194</sup>-PMLIVa<sup>3MAS</sup> together with doxycycline-inducible TRIPZ-  
921 MYC-CTurboID<sup>195</sup>-SUMO2nc. Doxycycline was added or not at 1 µg/mL for 24 hours.  
922 50 µM of biotin was added at indicated time-points. PML SUMO-ID showed a high  
923 PML/SUMO interaction dependency. **(D)** Confocal microscopy of the same cells as in  
924 (C), treated or not with doxycycline (1 µg/mL, 24 hours), biotin (50 µM, 2 hours) and  
925 ATO (1 µM, 2 hours). Nuclei are stained with DAPI (blue) and biotinylated material with  
926 fluorescent streptavidin (Strep, magenta). BirA antibody shows NTurboID<sup>194</sup>-PML  
927 staining (green). Black and white panels show the single green and magenta channels.  
928 Colocalization of the streptavidin and NTurboID<sup>194</sup>-PMLIVa<sup>WT</sup> signal is observed within  
929 PML NBs, that depends on PML-SUMO interaction. Scale bar: 5 µm. Molecular weight  
930 markers are shown to the left of the blots in kDa in (A-C).

931

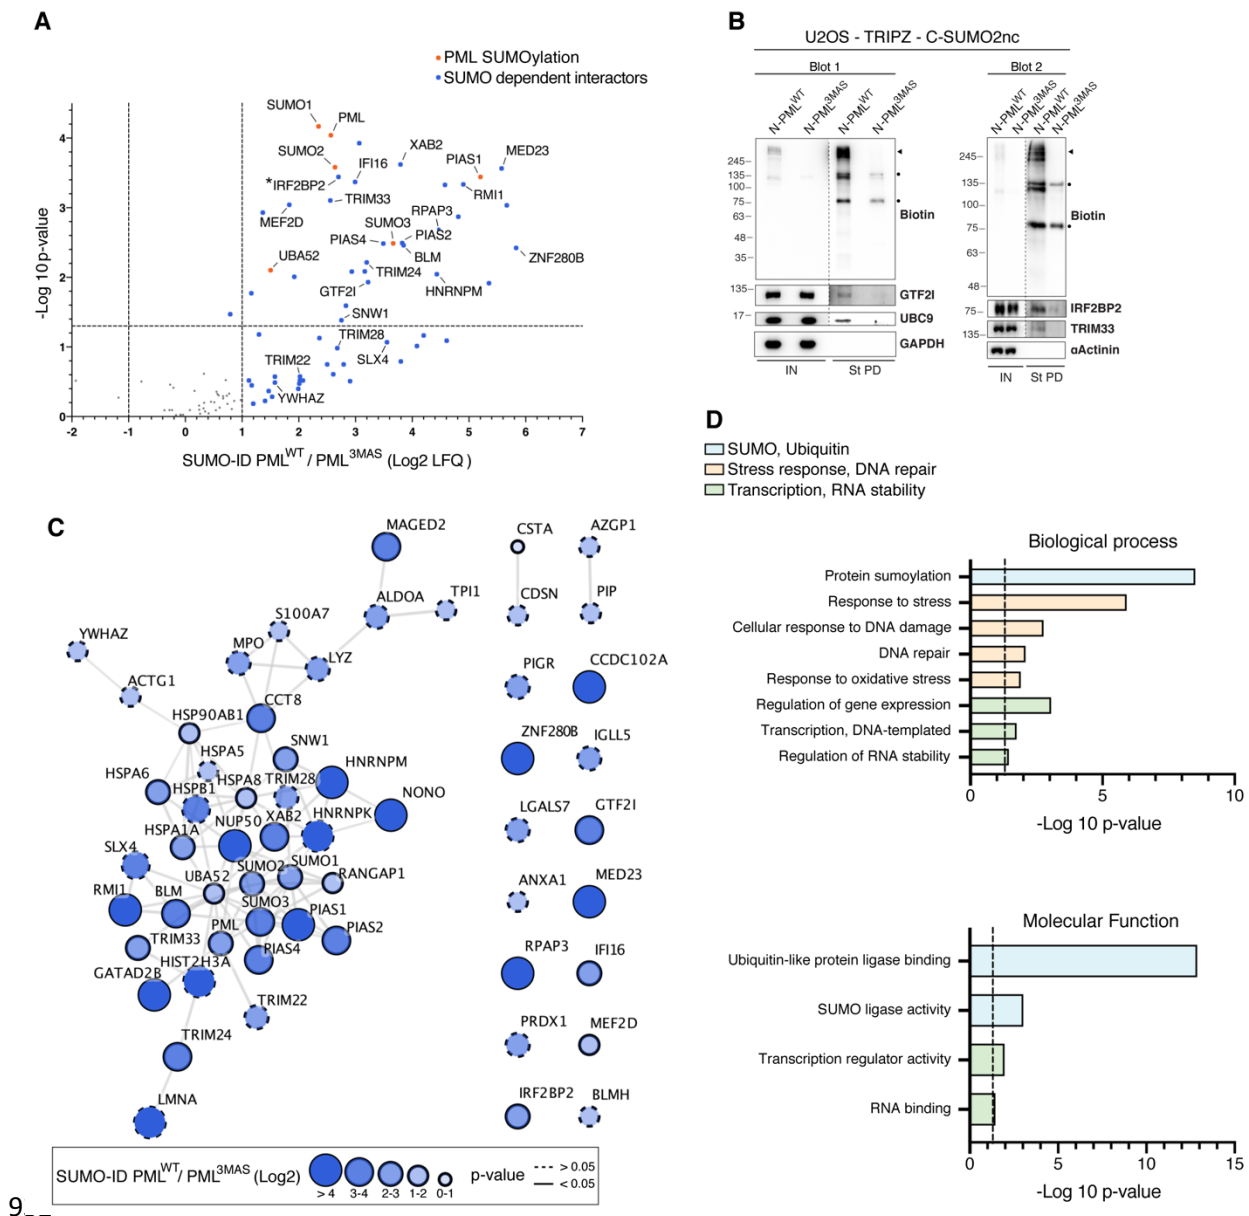

933 **Figure 4: SUMO-ID identifies SUMO-dependent interactors of PML.** (A) Volcano  
 934 plot of LC-MS analysis comparing streptavidin pull-downs of U2OS double stable cell  
 935 lines for TRIPZ-MYC-CTurboID<sup>195</sup>-SUMO2nc together with FLAG-NTurboID<sup>194</sup>-  
 936 PMLIVa<sup>WT</sup> or FLAG-NTurboID<sup>194</sup>-PMLIVa<sup>3MAS</sup>. Cells were treated with 1  $\mu$ g/mL of  
 937 doxycycline for 24 hours and 50  $\mu$ M of biotin for 2 hours. 59 high-confidence SUMO-  
 938 dependent PML interactors were defined. Asterisk (\*) indicates that IRF2BP2 was  
 939 detected with one peptide but further validated by Western blot and immunofluorescence.  
 940 (B) Western blot validations of PML SUMO-dependent interactors identified by SUMO-

941 ID in (A). Blots 1/2 represent 2 independent experiments. UBC9 was added as an  
942 expected positive control. Dots indicate endogenous carboxylases. Black arrowheads  
943 point to specific PML SUMO-ID biotinylating activity. IN: input; St PD: streptavidin  
944 pull-down. Molecular weight markers are shown to the left of the blots in kDa. **(C)**  
945 STRING network analysis of the 59 SUMO-dependent interactors of PML identified in  
946 (A). A highly interconnected cluster related to protein SUMOylation/ubiquitylation,  
947 transcriptional regulation, DNA repair and RNA stability proteins is depicted. Color,  
948 transparency and size of the nodes were discretely mapped to the Log2 enrichment value  
949 as described. The border line type was discretely mapped to the p-value as described. **(D)**  
950 Gene ontology analysis of the 59 SUMO-dependent interactors of PML identified in (A).  
951 Biological processes and molecular functions related to SUMOylation/ubiquitylation,  
952 stress response, DNA repair, transcription and RNA stability were significantly enriched.  
953 Dotted line represents the threshold of the p-value (0.05).

954

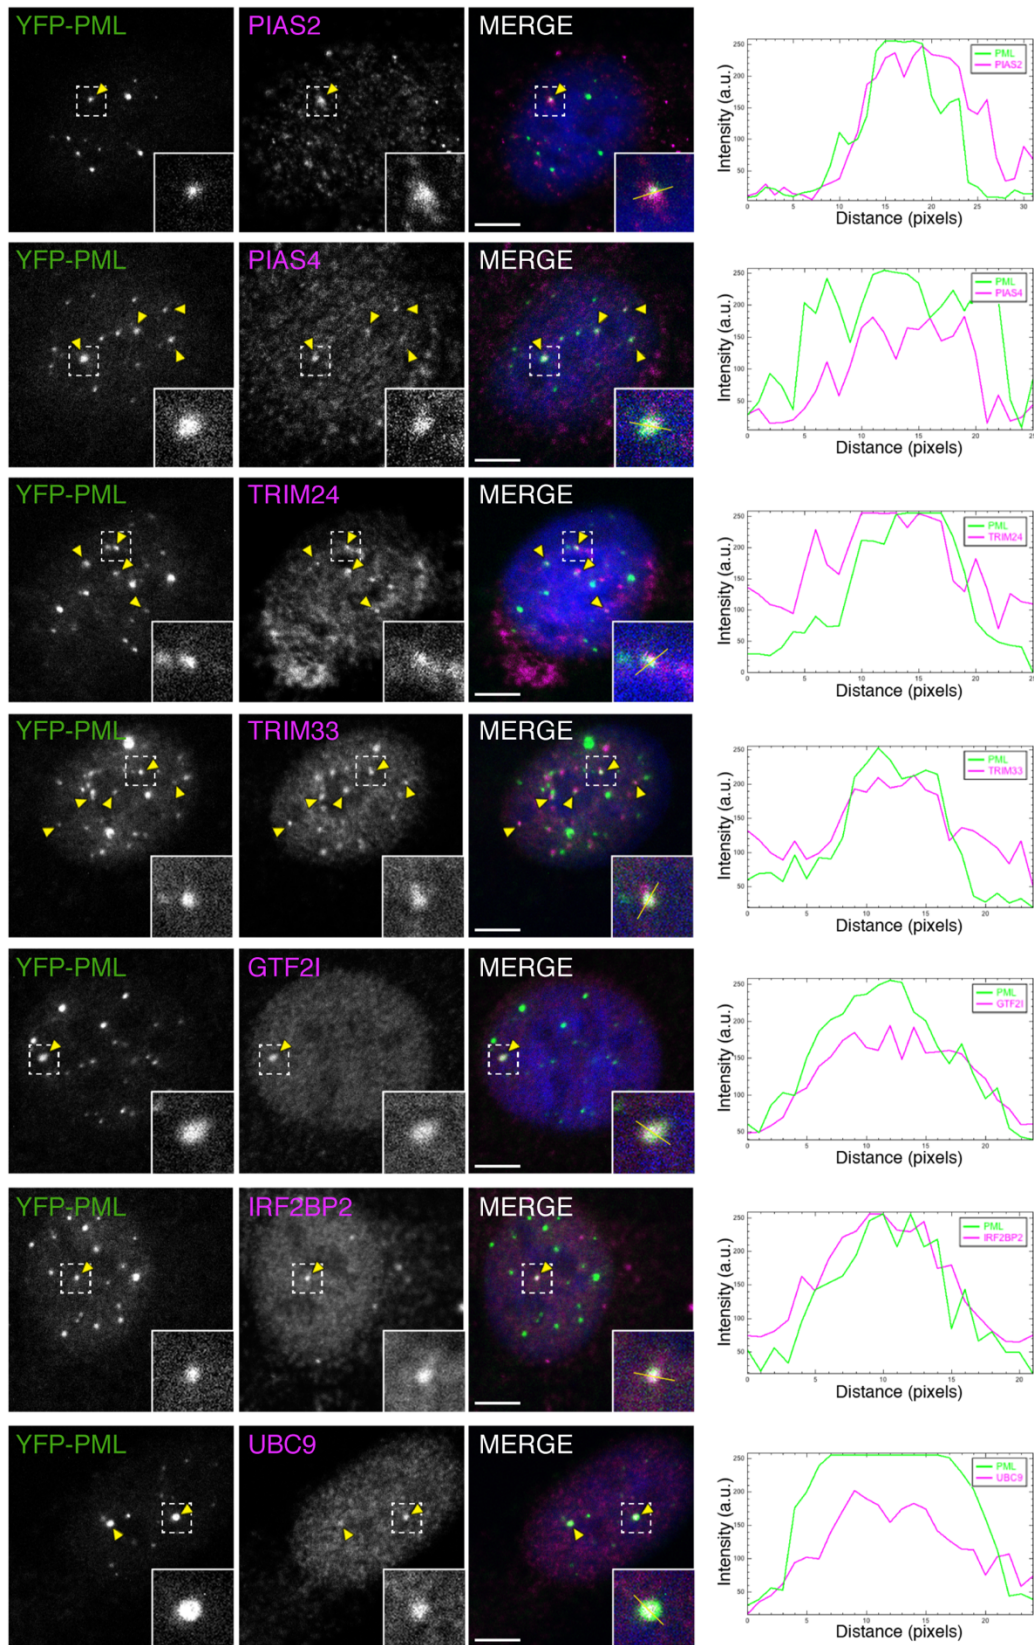

958 cell line. UBC9 was added as an expected positive control. Yellow arrowheads indicate  
959 colocalization events. Dotted line-squares show the selected colocalization events for  
960 digital zooming and the signal profile plotting shown to the right. Nuclei are stained with  
961 DAPI (blue), YFP-PML is shown in green and the indicated proteins in magenta. Black  
962 and white panels show the single green and magenta channels. Scale-bar: 5  $\mu$ m.

963

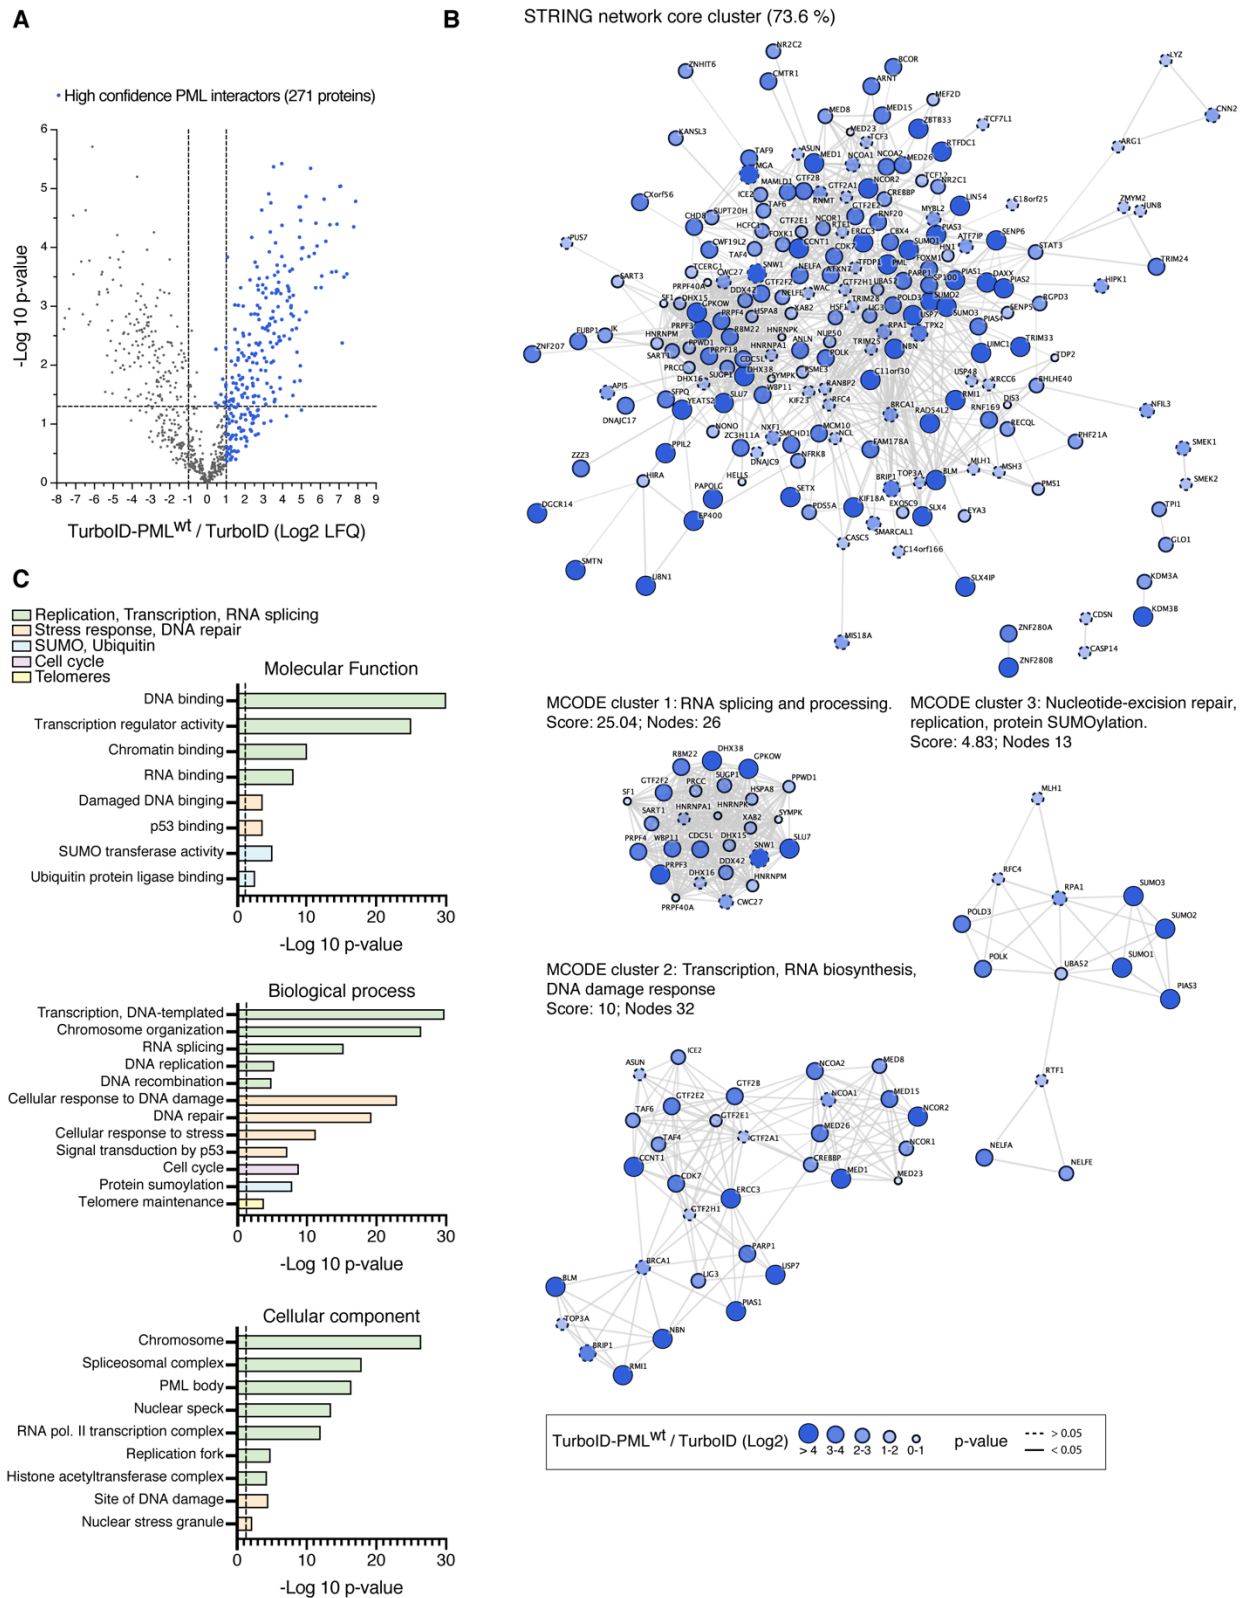

964

965 **Figure 6: Characterization of the whole PML NBs proteome.** (A) Volcano plot of LC-  
 966 MS analysis comparing streptavidin pull-downs of U2OS stable cell lines for TurboID-  
 967 PMLIVa<sup>WT</sup> or TurboID alone. Cells were treated with 50  $\mu$ M of biotin for 2 hours. High-

968 confidence PML proteome composed of 267 proteins is shown as blue dots. **(B)** STRING  
969 network analysis of the whole PML NBs proteome defined in (A) shows a high  
970 interconnected network composed of the 73.6% of the proteins. Highly interconnected  
971 sub-clusters were characterized using MCODE. Color, transparency and size of the nodes  
972 were discretely mapped to the Log2 enrichment value as described. The border line type  
973 was discretely mapped to the p-value as described. **(C)** Gene ontology analysis of the  
974 whole PML NBs proteome defined in (A). Depicted biological processes, molecular  
975 functions and cellular components were significantly enriched. Dotted line represents the  
976 threshold of the p-value (0.05).

977



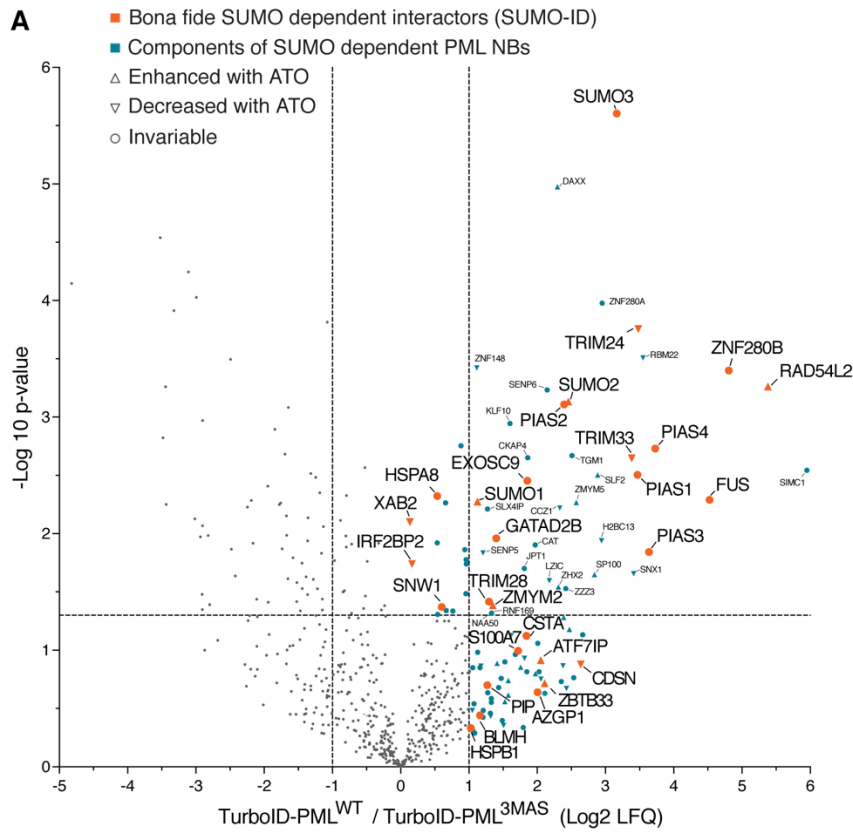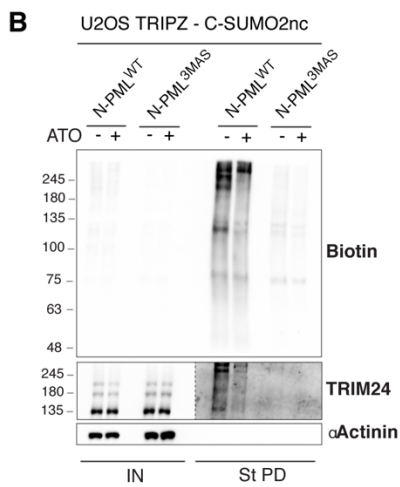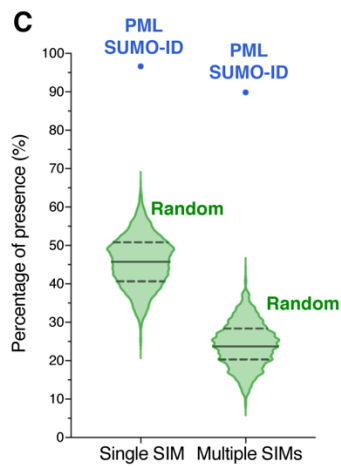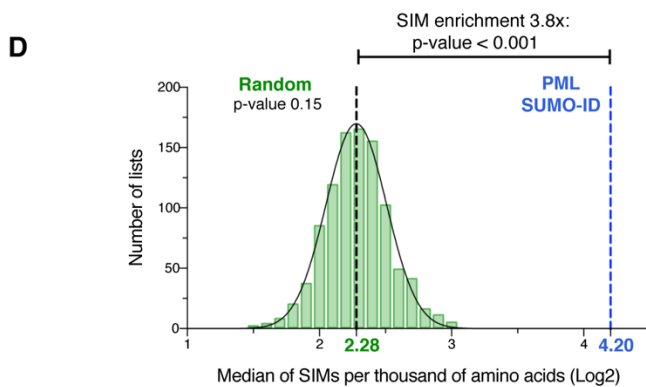

979 **Figure 7: Proteins identified by PML SUMO-ID are a subset of the SUMO-**  
980 **dependent PML NBs proteome and are enriched in SIMs. (A)** Volcano plot of LC-  
981 MS analysis comparing streptavidin pull-downs of U2OS stable cell lines for TurboID-  
982 PMLIVa<sup>WT</sup> or TurboID-PMLIVa<sup>3MAS</sup>. Cells were treated with 50  $\mu$ M of biotin for 2  
983 hours. Proteins enriched in TurboID alone compared to TurboID-PMLIVa<sup>WT</sup> were  
984 previously removed for the comparison. PML SUMO-ID identified proteins (including 1  
985 peptide identified proteins) are highlighted in orange. LC-MS data on the effect of the  
986 ATO treatment (1  $\mu$ M; 2 hours) for TurboID-PMLIVa<sup>WT</sup> enriched proteins is represented  
987 with symbols as described. **(B)** WB validation of the effect of ATO treatment (1  $\mu$ M; 2  
988 hours) on TRIM24 by PML SUMO-ID. Cells were treated with 1  $\mu$ g/mL of doxycycline  
989 for 24 hours and 50  $\mu$ M of biotin for 2 hours. After streptavidin pulldown, decreased  
990 levels of SUMO-PML interacting TRIM24 upon ATO treatment is observed. **(C)** Violin  
991 plots comparing the percentage of single SIM and multiple SIM presence in 1000 random  
992 lists and PML SUMO-ID list. The 1000 random lists contain the same number of proteins  
993 (59) as the SUMO-ID list. **(D)** SIM presence was normalized by the length of the proteins  
994 to obtain the value of SIMs per thousand of amino acids (STAA). Gaussian distribution  
995 of STAA median values of the random lists was validated (d'Agostino and Pearson  
996 normality test, p-value = 0.15), and PML SUMO-ID SIM enrichment factor was  
997 calculated. The dotted black line represents the median STAA value of random lists. The  
998 dotted blue line represents the STAA value of the PML SUMO-ID list.

999

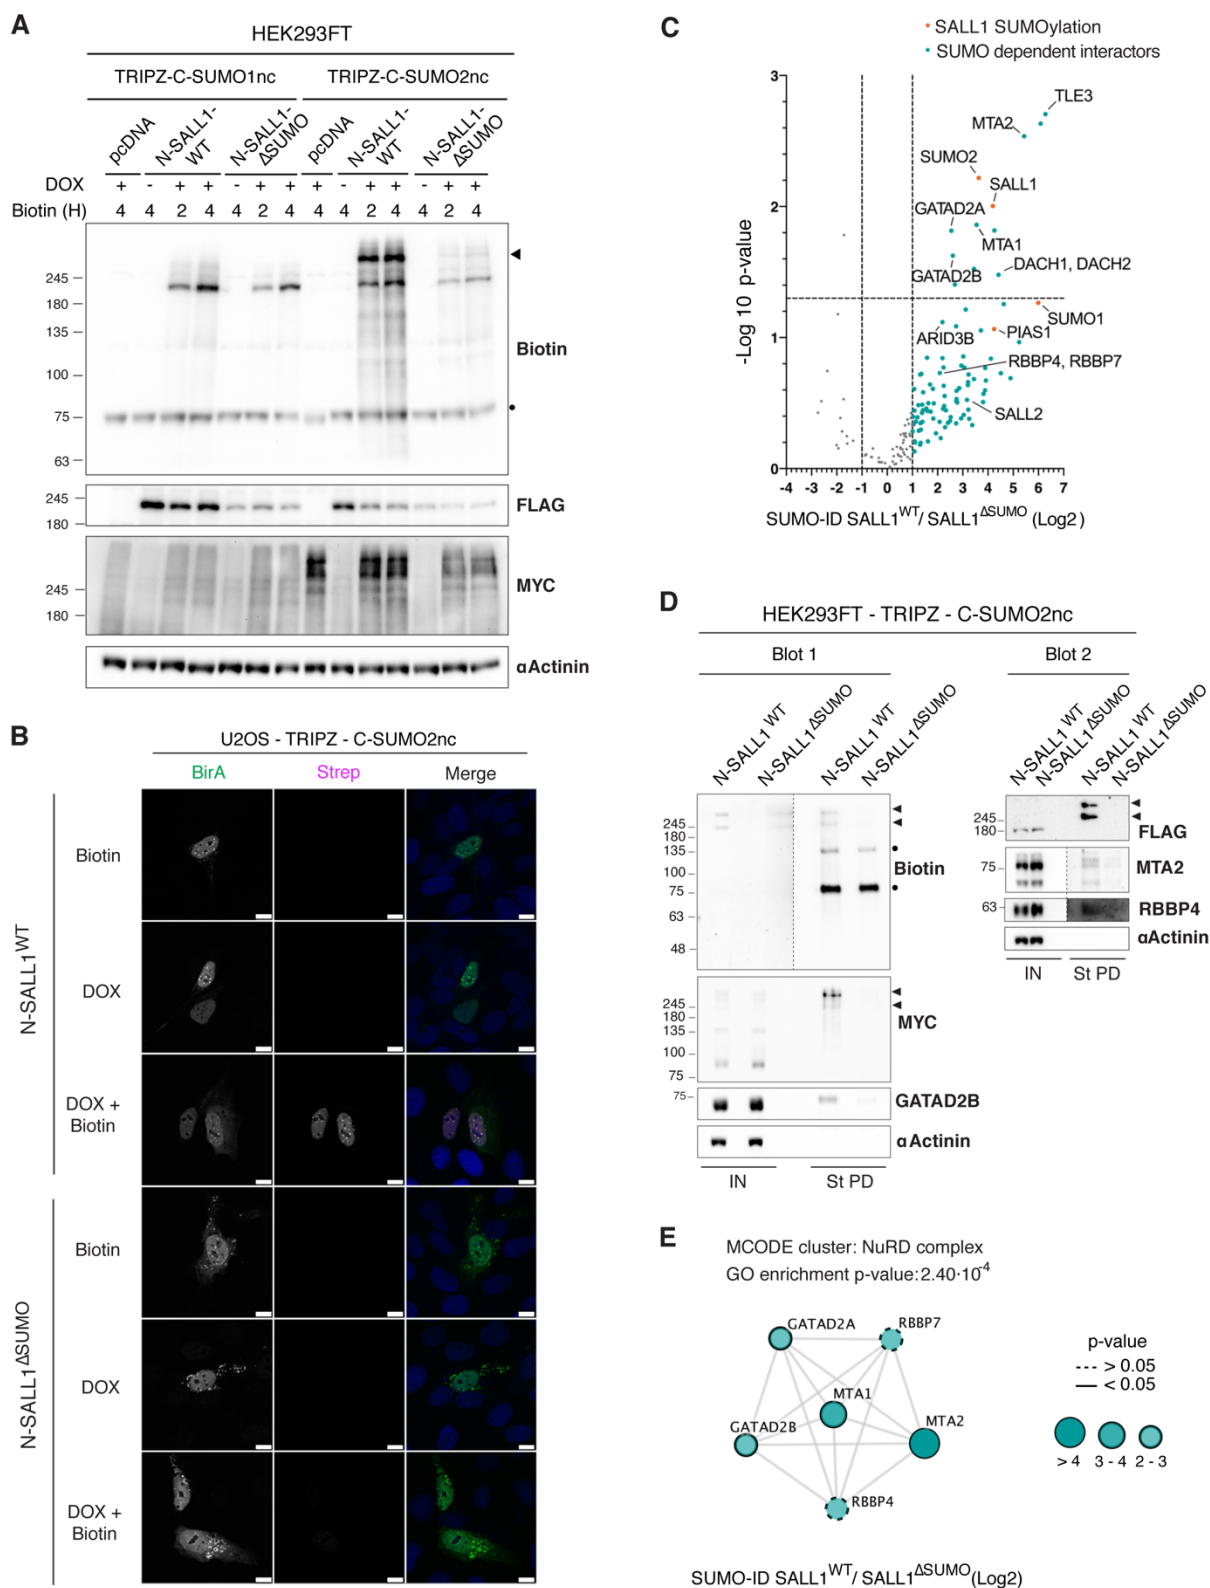

10

1001 **Figure 8: SUMO-ID identifies interactors of SUMOylated SALL1.** (A) WB of  
 1002 HEK293FT stable cell lines for TRIPZ-MYC-CTurboID<sup>195</sup>-SUMO1nc/SUMO2nc  
 1003 transfected with FLAG-NTurboID<sup>194</sup>-SALL1<sup>WT</sup> or the SUMO site mutant FLAG-

1004 NTurboID<sup>194</sup>-SALL1<sup>ΔSUMO</sup>. Cells were treated or not with 1 μg/mL of doxycycline for  
1005 24 hours and 50 μM of biotin at indicated time points. Efficient SALL1 SUMO-ID  
1006 biotinylating activity was detected for SUMO2nc (black arrowhead). Dot indicates  
1007 endogenous carboxylase. **(B)** Confocal microscopy of U2OS stable cell line for TRIPZ-  
1008 MYC-CTurboID<sup>195</sup>-SUMO2nc transfected with FLAG-NTurboID<sup>194</sup>-SALL1<sup>WT</sup> or the  
1009 SUMO site mutant FLAG-NTurboID<sup>194</sup>-SALL1<sup>ΔSUMO</sup>. Cells were treated or not with 1  
1010 μg/mL of doxycycline for 24 hours and 50 μM of biotin for 4 hours. Nuclei are stained  
1011 with DAPI (blue) and biotinylated material with fluorescent streptavidin (Strep,  
1012 magenta). BirA antibody shows NTurboID<sup>194</sup>-SALL1 staining (green). Black and white  
1013 panels show the single green and magenta channels. Nuclear colocalization of FLAG-  
1014 NTurboID<sup>194</sup>-SALL1<sup>WT</sup> and streptavidin signal was observed. **(C)** Volcano plot of LC-  
1015 MS analysis comparing streptavidin pull-downs of HEK293FT TRIPZ-MYC-  
1016 CTurboID<sup>195</sup>-SUMO2nc stable cell line transfected with FLAG-NTurboID<sup>194</sup>-SALL1<sup>WT</sup>  
1017 or the SUMO site mutant FLAG-NTurboID<sup>194</sup>-SALL1<sup>ΔSUMO</sup>. Cells were treated with 1  
1018 μg/mL of doxycycline for 24 hours and 50 μM of biotin for 4 hours. Potential interactors  
1019 of SUMOylated SALL1 are depicted. **(D)** Western blot validations of SUMOylated  
1020 SALL1 interactors found in (C). NuRD complex proteins GATAD2B, MTA2 and RBBP4  
1021 were confirmed. Black arrowheads point to SUMOylated SALL1 signal. Dots indicate  
1022 endogenous carboxylases. **(E)** STRING network analysis of the SALL1 SUMO-ID list  
1023 and MCODE clustering identifies the NuRD complex as a highly interconnected  
1024 subcluster. Gene ontology analysis also identified the NuRD complex as an enriched  
1025 term. Color, transparency and size of the nodes were discretely mapped to the Log2  
1026 enrichment value as described. The border line type was discretely mapped to the p-value  
1027 as described. Molecular weight markers are shown to the left of the blots in kDa in (A,  
1028 D).
